1  
2  
3  
4  
5  
6  
7  
8  
9  
10  
11  
12  
13  
14  
15  
16  
17  
18  
19  
20  
21  
22  
23

## Seasonal patterns of dengue fever in rural Ecuador: 2009—2016

### Seasonality of dengue fever in Ecuador

Rachel Sippy<sup>1,2,#a</sup>, Diego Herrera<sup>3</sup>, David Gaus<sup>3</sup>, Ronald E. Gangnon<sup>1,4</sup>, Jonathan A. Patz<sup>1,5</sup>, and Jorge E. Osorio<sup>6\*</sup>

<sup>1</sup>Department of Population Health Sciences, University of Wisconsin-Madison, Madison, Wisconsin, United States of America

<sup>2</sup>Department of Family Medicine & Community Health, University of Wisconsin-Madison, Madison, Wisconsin, United States of America

<sup>3</sup>Salud y Desarrollo Andino, Pedro Vicente Maldonado, Pichincha, Ecuador

<sup>4</sup>Department of Biostatistics & Medical Informatics, University of Wisconsin-Madison, Madison, Wisconsin, United States of America

24 <sup>5</sup>Nelson Institute for Environmental Studies, University of Wisconsin-Madison, Madison, Wisconsin,

25 United States of America

26

27 <sup>6</sup>Department of Pathobiological Sciences, University of Wisconsin-Madison, Madison, Wisconsin, United

28 States of America

29

30 <sup>#a</sup>Current Address: Department of Medical Geography, University of Florida, Gainesville, Florida, United

31 States of America

32

33

34 \* Corresponding author

35 Email: [jorge.osorio@wisc.edu](mailto:jorge.osorio@wisc.edu)

36

## 37 **Abstract**

38 Season is a major determinant of infectious disease rates, including arboviruses spread by mosquitoes,  
39 such as dengue, chikungunya, and Zika. Seasonal patterns of disease are driven by a combination of  
40 climatic or environmental factors, such as temperature or rainfall, and human behavioral time trends,  
41 such as school year schedules, holidays, and weekday-weekend patterns. These factors affect both  
42 disease rates and healthcare-seeking behavior. Seasonality of dengue fever has been studied in the  
43 context of climatic factors, but short- and long-term time trends are less well-understood. With 2009—  
44 2016 medical record data from patients diagnosed with dengue fever at two hospitals in rural Ecuador,  
45 we used Poisson generalized linear modeling to determine short- and long-term seasonal patterns of  
46 dengue fever, as well as the effect of day of the week and public holidays. In a subset analysis, we  
47 determined the impact of school schedules on school-aged children. With a separate model, we

48 examined the effect of climate on diagnosis patterns. In the first model, the most important predictors  
49 of dengue fever were annual sinusoidal fluctuations in disease, long-term trends, day of the week, and  
50 hospital. Seasonal trends showed single peaks in case diagnoses, during April. Compared to an average  
51 day, cases were more likely to be diagnosed on Tuesdays (risk ratio (RR): 1.26, 95% confidence interval  
52 (CI) 1.05—1.51) and Thursdays (RR: 1.25, 95% CI 1.02—1.53), and less likely to be diagnosed on  
53 Saturdays (RR: 0.81, 95% CI 0.65—1.01) and Sundays (RR: 0.74, 95% CI 0.58—0.95). Public holidays were  
54 not significant predictors of dengue fever diagnoses, except for an increase in diagnoses on the day after  
55 Christmas (RR: 2.77, 95% CI 1.46—5.24). School schedules did not impact dengue diagnoses in school-  
56 aged children. In the climate model, important climate variables included the monthly total precipitation  
57 (RR: 2.14, 95% CI 1.26—3.64), an interaction between total precipitation and monthly absolute  
58 minimum temperature (RR: 0.93, 95% CI 0.88—0.98), an interaction between total precipitation and  
59 monthly precipitation days (RR: 0.90, 95% CI 0.82—0.99 ), and a three-way interaction between  
60 minimum temperature, total precipitation, and precipitation days (RR: 1.01, 95% CI 1.00—1.02). This is  
61 the first report of long-term dengue fever seasonality in Ecuador, one of few reports from rural patients,  
62 and one of very few studies utilizing daily disease reports. These results can inform local disease  
63 prevention efforts, public health planning, as well as global and regional models of dengue fever trends.

64

## 65 **Author summary**

66 Dengue fever exhibits a seasonal pattern in many parts of the world, much of which has been attributed  
67 to climate and weather. However, additional factors may contribute to dengue seasonality. With 2009—  
68 2016 medical record data from rural Ecuador, we studied the short- and long-term seasonal patterns of  
69 dengue fever, as well as the effect of school schedules and public holidays. We also examined the effect  
70 of climate on dengue. We found that dengue diagnoses peak once per year during April, but that  
71 diagnoses are also affected by day of the week. Dengue was also impacted by regional climate and

72 complex interactions between local weather variables. This is the first report of long-term dengue fever  
73 seasonality in Ecuador, one of few reports from rural patients, and one of very few studies utilizing daily  
74 disease reports. This is the first report on the impacts of school schedules, holidays, and weekday-  
75 weekend patterns on dengue diagnoses. These results suggest a potential impact of human behaviors  
76 on dengue exposure risk. More broadly, these results can inform local disease prevention efforts and  
77 public health planning, as well as global and regional models of dengue fever trends.

78

## 79 **Introduction**

80 Seasonality of infectious disease is a phenomenon commonly observed in the northern and southern  
81 hemispheres, with seasonality of influenza being the most well-known and well-studied infectious  
82 disease with a seasonal pattern [1-6]. Seasonality has also been observed with other infectious diseases,  
83 including malaria [7], dengue [8], tuberculosis [9, 10], acute respiratory infection [1, 11], and foodborne  
84 illness [12-15]. These relationships are often a combination of climatic and environmental factors and  
85 how these factors affect pathogen transmissibility [15, 16], vector abundance [8, 17-21], and human  
86 health, and drive human behaviors such as diet, crowding, travel patterns, and outdoor exposures [8,  
87 14, 15, 19, 20].

88 Mosquito-borne viral infections include dengue fever, yellow fever, chikungunya, and Zika, among  
89 others [22]. These illnesses are common in tropical countries and are most often spread by mosquitoes  
90 in the *Aedes* genus. Dengue virus is the most common, and may present with fever, rash, and general  
91 pain; although an estimated 80% of dengue patients are asymptomatic [23], this infection can have  
92 serious health consequences, including death [24].

93 The diagnosis of dengue and other acute febrile illnesses can be extremely difficult, depending on the  
94 stage of the illness and the resources available at the point of care. Dengue cannot always be  
95 distinguished from other febrile illnesses, though diagnostic testing, including rapid tests, ELISA, and

96 PCR-based assays are sometimes available and can aid with diagnosis [25], though the sensitivity and  
97 specificity of these tests are not perfect. Correct diagnosis of dengue additionally relies on the patient's  
98 presenting signs and symptoms as well as the expertise of the clinician.

99 Seasonality affects dengue diagnosis rates through several mechanisms. Seasons drive human behavior:  
100 people may be more or less likely to spend time crowded indoors or spread outdoors depending on the  
101 time of year, which affects exposure rates. This can be the result of weather conditions or a result of  
102 seasonal holidays, which affect school and work schedules, and drive public gatherings (such as parades)  
103 or private family gatherings. There is also reason to believe that seasonality affects host immunity: in  
104 tropical countries, both cell-mediated and humoral immune responses are decreased during the rainy  
105 season [26]. This could be driven by seasonal variation in gene expression [27], levels of immune-  
106 modulators and blood cell composition [28], food availability, daylight exposure, and/or environmental  
107 exposures [26], though the causal direction of changes in the immune system, season, and seasonal  
108 disease is unclear. In addition, long-term disease trends are often a reflection of a buildup of disease-  
109 specific immunity in a population: for outbreaks to occur, there must be a sufficient number of  
110 susceptible individuals in the population. If all persons in the community were infected in the previous  
111 years and are therefore immune to circulating strains of virus, no outbreak will occur and the season will  
112 have a relatively low intensity, and the low intensity will continue until additional susceptibles are  
113 available from birth, migration, or introduction of a new dengue serotype.

114 Climate is a major component of seasonality and directly impacts the life history and behavior of the  
115 mosquito vector. *Aedes aegypti*, which is the principal vector of dengue in Ecuador, has been well-  
116 characterized in its relationship to temperature, which has been shown to impact development rates,  
117 lifespan, fecundity, survival, biting rates, transmission probability, infection probability, abundance and  
118 incubation rates in both field and laboratory studies [29-36]. Field studies of rainfall have found  
119 associations between larval or adult abundance and precipitation [37-39]. Because temperature and

120 precipitation can affect mosquitoes throughout their life course, the temporal scale of climate-mosquito  
121 associations can vary, depending on the life stage of the mosquito. For example, lagged precipitation  
122 (one to two months prior) is linked to larval indices due to the impact of precipitation on larval breeding  
123 sites [37], while both lagged temperature (4 weeks) and unlagged [*i.e.* current] mean temperature have  
124 been associated with adult abundance [39, 40]. Adult abundance and biting patterns are critical to  
125 dengue risk; climate plays a major role in the activity levels of these vectors [33].

126 The climate of Ecuador is highly diverse; though small in area, it contains 11 different Köppen-Geiger  
127 climate classifications, with the coast being generally classified as hot and semi-arid or tropical savanna  
128 climates, the central Andean range as oceanic or warm-summer Mediterranean climates, and the  
129 eastern rainforest as tropical rainforest climates [41]. Ecuador is also impacted by the El Niño/Southern  
130 Oscillation (ENSO) phenomenon in which the surface temperature of the Pacific ocean leads to periodic  
131 changes in regional weather patterns [42]. Specifically, an El Niño year will be warmer and wetter than  
132 average in Ecuador, and a La Niña year will be drier and cooler than average [42].

133 Studies of disease seasonality in tropical regions are limited. For mosquito-borne disease, previous  
134 research has largely focused on climatic and environmental variables, which directly affect vector  
135 abundance. In Ecuador, this research has been limited to two studies of dengue cases in coastal regions;  
136 In one study, minimum weekly temperature and mean weekly precipitation were shown to be strongly  
137 linked to weekly number of dengue cases [19]. A second study in the same area found that minimum  
138 weekly temperature, precipitation, and El Niño events were positively associated with dengue risk [20].  
139 These studies both occurred in a large city the southern coast of Ecuador; given the diversity of climates  
140 and communities in Ecuador and the need for relevant evidence to make policy decisions, it is important  
141 to determine if the causal relationships between seasonal factors, climates, and dengue cases are similar  
142 in other areas of Ecuador.

143 With the present study we determined the seasonality of dengue fever by decomposing seasonality into  
144 two components: temporal seasonality and climate-driven seasonality, using data from patients  
145 clinically diagnosed with dengue fever at two hospitals in rural Ecuador with a subtropical climate.  
146 Temporal trends included short- and long-term trends, and the effects of school sessions, public  
147 holidays, and weekdays on these diagnoses. Climate-driven trends included an examination of regional  
148 and local climate variable impacts on dengue fever diagnoses.

## 149 **Methods**

### 150 **Study population & site**

151 Hospital Pedro Vicente Maldonado (HPVM) is a 17-bed rural hospital located in Pedro Vicente  
152 Maldonado (PVM), Pichincha, Ecuador (Fig 1). It primarily serves patients from Cantons Pedro Vicente  
153 Maldonado, Puerto Quito, San Miguel de los Bancos, and Santo Domingo. Pedro Vicente Maldonado is  
154 located at 0°05'12.3"N, 79°03'08.0"W, and northwest of Quito, at approximately 600 meters altitude,  
155 with a projected 2016 population of 6,944. Hospital Saludesá (HS) is a 60-bed metropolitan hospital  
156 located in Santo Domingo de los Tsáchilas (SD), Santo Domingo de los Tsáchilas, Ecuador (Fig 1). It serves  
157 patients from Santo Domingo de los Tsáchilas Province. Santo Domingo de los Tsáchilas is located at  
158 0°15'15"S, 79°10'19"W, and west of Quito, at approximately 550 meters altitude, with a population of  
159 305,632 (2010 Census). Both hospitals have 24-hour, 7-days-a-week emergency rooms, with regular  
160 consultation available on Mondays—Saturdays. During holidays, only the emergency room services are  
161 available. Both hospitals have clinical laboratory services available, including the NS1 dengue antigen  
162 rapid and dengue IgG antibody tests. These cities have a tropical rainforest climate; average monthly  
163 temperatures run from 71.8° Fahrenheit (22.1° Celsius) in November to 74.8° Fahrenheit (23.8° Celsius)  
164 in March. Average total monthly precipitation runs from 110 millimeters in July to 671 millimeters in  
165 April. Both sites have ongoing mosquito control programs. Cities are fumigated approximately once per

166 month with repellent, and residents are provided with temephos (Abate®) treatment for water stored in  
167 large laundry tanks.

168

169 **Fig 1. Study Site Locations.** This map depicts the locations of the two hospitals used in the study,  
170 Hospital Saludesá and Hospital Pedro Vicente Maldonado, as well as the climate station. Inset, coast of  
171 Ecuador, with a square marking the relative position of the larger map. PVM=Pedro Vicente Maldonado,  
172 INAMHI=Instituto Nacional de Meteorología e Hidrología. Basemap tiles by © OpenStreetMap  
173 contributors, under CC BY-SA (<https://www.openstreetmap.org/copyright>). Inset tiles from by © Stamen  
174 Design, under CC BY 3.0 ([maps.stamen.com](https://maps.stamen.com)). Maps were modified by R.S. for this manuscript.

175

## 176 **Data Collection**

177 For this medical record review, we examined de-identified records with a primary diagnosis of  
178 arthropod-borne viral fevers and viral hemorrhagic fevers. These included International Statistical  
179 Classification of Diseases and Related Health Problems, 10th Revision (ICD-10) codes A90–A99. Records  
180 from Hospital Pedro Vicente Maldonado included consult dates from August 1, 2009 through July 31,  
181 2016. Records from Hospital Saludesá included consult dates from July 1, 2014 through July 31, 2016.  
182 The following variables were available for analysis: consult date, primary diagnosis, ICD-10 code, and  
183 patient demographics (age, sex, insurance status, weight, and height). Patients missing more than 50%  
184 of these variables were excluded. Information regarding school schedules and holiday dates in each year  
185 was obtained from the Ecuadorian Ministry of Education, the Ministry of Tourism and local residents  
186 [43-46]. School sessions and holidays analyzed in this study are in Table 1. Data for monthly climate  
187 variables measured at the La Concordia station (0°01'29.0"N, 79°22'49.0"W, Fig 1) were obtained from  
188 the National Institute of Meteorology and Hydrology in Ecuador [47, 48]. Oceanic Niño Indices (ONI), a



189 measure of ENSO effects, were obtained from the National Weather Service  
 190 ([http://www.cpc.ncep.noaa.gov/products/analysis\\_monitoring/ensostuff/ensoyears.shtml](http://www.cpc.ncep.noaa.gov/products/analysis_monitoring/ensostuff/ensoyears.shtml)).

191

192 **Table 1. School Sessions & Holidays.**

| Event                                                               | Typical Date(s)                                                                                                                                               | Total Days in Dataset <sup>b</sup> |
|---------------------------------------------------------------------|---------------------------------------------------------------------------------------------------------------------------------------------------------------|------------------------------------|
| School Semester                                                     | May 4 <sup>th</sup> —October 2 <sup>nd</sup> , October<br>12 <sup>th</sup> —December 23 <sup>rd</sup> , January<br>4 <sup>th</sup> —February 26 <sup>th</sup> | 1884                               |
| New Year's Eve, New Year's Day                                      | December 31 <sup>st</sup> & January 1 <sup>st</sup>                                                                                                           | 21                                 |
| Anniversary of Pedro Vicente Maldonado <sup>a</sup>                 | January 16 <sup>th</sup>                                                                                                                                      | 25                                 |
| Carnival <sup>a</sup>                                               | February 15 <sup>th</sup> —18 <sup>th</sup>                                                                                                                   | 20                                 |
| Easter <sup>a</sup>                                                 | April 2 <sup>nd</sup>                                                                                                                                         | 11                                 |
| Labor Day                                                           | May 1 <sup>st</sup>                                                                                                                                           | 9                                  |
| Anniversary of the Battle of Pichincha <sup>a</sup>                 | May 24 <sup>th</sup>                                                                                                                                          | 12                                 |
| Independence Day <sup>a</sup>                                       | August 10 <sup>th</sup>                                                                                                                                       | 16                                 |
| Anniversary of the Battle of Guayaquil <sup>a</sup>                 | October 9 <sup>th</sup>                                                                                                                                       | 19                                 |
| All Soul's Day, Anniversary of the Battle of<br>Cuenca <sup>a</sup> | November 2 <sup>nd</sup> —5 <sup>th</sup>                                                                                                                     | 20                                 |
| Christmas Eve, Christmas Day                                        | December 24 <sup>th</sup> & 25 <sup>th</sup>                                                                                                                  | 18                                 |
| One Day After Christmas                                             | December 26 <sup>th</sup>                                                                                                                                     | 9                                  |

193 <sup>a</sup>Date shown for 2015, official celebration date varies annually

194 <sup>b</sup>Each holiday period included the official public holiday date, and the preceding/following weekend days

195 if the date fell on a Friday or a Monday.

196

## 197 **Ethics**

198 This research was certified as non-human subjects research by the Institutional Review Board of  
199 University of Wisconsin-Madison (#2017-0033).

200

## 201 **Statistical Analysis**

202 Four observations (5% of total) for monthly absolute minimum temperature were missing. Multiple  
203 imputation was used to estimate these values. Using all available monthly climate variables, monthly  
204 case counts, and time. Ten imputations were performed with a fully conditional specification algorithm;  
205 parameters were pooled and used to obtain estimates.

206 Log-linked Poisson generalized linear models with generalized estimating equations (GEE)  
207 (autoregressive correlation structure) were used for all models. Models using GEE account for  
208 correlation in data, as is common in time series data. To account for temporal autocorrelation, cases  
209 were clustered by week of diagnosis. Model fit was assessed using quasi-likelihood under the  
210 independence model information criterion (QIC). Model 1 was used to evaluate the intra-annual and  
211 long-term seasonality of common diseases in a temporal seasonal model. Daily case counts were the  
212 outcome of interest and data from both hospitals were combined, with an indicator variable for hospital  
213 of origin. Long-term trends were estimated with a restricted cubic spline; number of knots was  
214 determined by best fit. For intra-annual effects, we compared sine and cosine waves with frequencies of  
215 once, twice, and/or three times in 365 days, using best fit to select the final fit. After selecting the best  
216 fit for the long-term and intra-annual effects, we added day-of-week and holidays as indicator variables,  
217 with the hypothesis that day-of-week may impact care-seeking decisions, and that patients may be less  
218 likely to seek care on a holiday (due to family obligations or travel). Holidays included official

219 government-declared holidays and any weekends immediately before or after these holidays, as well as  
220 the day after Christmas.

221 Because children may differ in their exposure to dengue risk factors when school is in session, the effect  
222 of school schedules were examined using a subset analysis (Model 2). We restricted this analysis to  
223 school-aged children (ages 4–18) who sought care at Hospital Pedro Vicente Maldonado (n=142). We  
224 used the best-fit long-term and intra-annual effects model from the first analysis, and included an  
225 indicator variable for days where school was in session (including weekends during the school year).

226 To determine the impact of climate on disease seasonality, we built a log-linked Poisson generalized  
227 linear model (Model 3). Climate data were available as monthly averages, so daily case counts were  
228 aggregated to monthly counts. Temperature and precipitation variables were centered on their mean  
229 value; temperatures were scaled at 2° Celsius, number of days with precipitation were scaled at 5 days  
230 and total monthly precipitation was scaled at 10 millimeters. The effects of climate variables (all  
231 continuous or integer variables), including ONI, average monthly temperature, minimum monthly  
232 temperature, maximum monthly temperature, total monthly precipitation, and number of days per  
233 month with precipitation were evaluated. Because climate variables interact with each other in reality,  
234 we also examined interactions between the significant climate variables in the final model.

235 Data analysis and visualization was performed using SAS version 9.2 (SAS Institute, Cary, NC) including  
236 the macros DASPLINE, DSHIDE, and weekno [49, 50], and R version 3.2.2 (R Foundation for Statistical  
237 Computing, Vienna, Austria) including packages haven, raster, dismo, ggmap, OpenStreetMap, sp,  
238 geepack, and MASS [51-59].

239

## 240 **Results**

241 Characteristics of the data used in this study are in Table 2, with patient demographics available in  
242 Supplemental Table 1. No cases were excluded. The diagnoses in the dataset included dengue fever

243 (A90), dengue hemorrhagic fever (A91), other mosquito-borne viral fevers (A92), and mosquito-borne  
 244 viral encephalitis (A83). Dengue diagnoses comprised 98.7% of the patients in the study. On average,  
 245 one case is diagnosed at Pedro Vicente Maldonado every 4.3 days, and one case is diagnosed at  
 246 Saludesá every 25 days. Time series plots of aggregated monthly case data from both hospitals, and  
 247 monthly climate data are in Figure 2.

248

249 **Table 2. Data Characteristics.**

| <b>Cases and Climate Factors</b> |                         | <b>Pedro Vicente<br/>Maldonado</b> | <b>Saludesá</b> |
|----------------------------------|-------------------------|------------------------------------|-----------------|
| <b>Dengue Fever Cases</b>        | <b>n</b>                | 580                                | 34              |
|                                  | <b>Daily Minimum</b>    | 0                                  | 0               |
|                                  | <b>Daily Mean</b>       | 0.23                               | 0.04            |
|                                  | <b>Daily Maximum</b>    | 4                                  | 3               |
|                                  | <b>2009<sup>a</sup></b> | 38                                 | -               |
|                                  | <b>2010</b>             | 129                                | -               |
|                                  | <b>2011</b>             | 77                                 | -               |
|                                  | <b>2012</b>             | 113                                | -               |
|                                  | <b>2013</b>             | 47                                 | -               |
|                                  | <b>2014</b>             | 103                                | 2               |
|                                  | <b>2015</b>             | 58                                 | 32              |
|                                  | <b>2016<sup>a</sup></b> | 15                                 | 0               |
|                                  | <b>January</b>          | 52                                 | 2               |
|                                  | <b>February</b>         | 50                                 | 5               |

|                                                       |                  |       |       |
|-------------------------------------------------------|------------------|-------|-------|
|                                                       | <b>March</b>     | 57    | 4 250 |
|                                                       | <b>April</b>     | 45    | 4 251 |
|                                                       | <b>May</b>       | 64    | 7 252 |
|                                                       | <b>June</b>      | 48    | 2     |
|                                                       | <b>July</b>      | 54    | 2 253 |
|                                                       | <b>August</b>    | 44    | 1 254 |
|                                                       | <b>September</b> | 37    | 1 255 |
|                                                       | <b>October</b>   | 42    | 1 256 |
|                                                       | <b>November</b>  | 44    | 1     |
|                                                       | <b>December</b>  | 43    | 4 257 |
| <b>Oceanic Niño Index</b>                             | <b>Minimum</b>   | -1.5  | 258   |
|                                                       | <b>Mean</b>      | 0.30  | 259   |
|                                                       | <b>Maximum</b>   | 2.3   | 260   |
| <b>Absolute Minimum Temperature (degrees Celsius)</b> | <b>Minimum</b>   | 12.9  |       |
|                                                       | <b>Mean</b>      | 20.0  | 261   |
|                                                       | <b>Maximum</b>   | 22.1  | 262   |
| <b>Total Precipitation (millimeters)</b>              | <b>Minimum</b>   | 3.6   | 263   |
|                                                       | <b>Mean</b>      | 278.1 |       |
|                                                       | <b>Maximum</b>   | 989.9 | 264   |
| <b>Monthly Number of Days with Precipitation</b>      | <b>Minimum</b>   | 5     | 265   |
|                                                       | <b>Mean</b>      | 20    | 266   |
|                                                       | <b>Maximum</b>   | 31    | 267   |

<sup>a</sup>These are partial years in this dataset

269 **Fig 2. Time Series Plots for Dataset.** Monthly averages for Oceanic Niño Index (orange), minimum (blue),  
270 mean (black), and maximum (red) temperature, precipitation (green), and diagnoses (purple) are plotted  
271 over the time period of the study.

272  
273 The final model for temporal seasonality (Model 1) included a sine and cosine wave with an annual  
274 cycle, long-term trend effects, day-of-week effects, and indicator variables to designate holidays and  
275 hospitals. Fits metrics for the null model and each considered model are available in Supplemental Table  
276 2. Model 1 predictions for daily diagnoses are presented in Fig 3 and exhibit an annual peak of disease in  
277 early April each year. At the beginning of the time series (2009-2010) there was an average of one case  
278 every 3.2 days and at the end of the time series (2015-2016) there was an average of one case every 10  
279 days. Day-of-week effects are summarized in Fig 4. Compared to the average day, Tuesdays and  
280 Thursdays were more likely to have dengue fever diagnoses (Tuesday: relative risk (RR)=1.26, 95%  
281 confidence interval (CI) 1.05—1.51,  $p=0.013$ , Thursday: RR=1.25, 95% CI 1.02—1.53,  $p=0.030$ ), while  
282 Saturdays and Sundays were less likely to have dengue fever diagnoses (Saturday: RR: 0.81, 95% CI  
283 0.65—1.01,  $p=0.062$  Sunday: RR: 0.74, 95% CI 0.58—0.95,  $p=0.016$ ). Compared to non-holidays, dengue  
284 fever cases were much more likely to be diagnosed the day after Christmas (RR: 2.77, 95% CI 1.46—5.24,  
285  $p=0.002$ ), after holding all other covariates constant. The subanalysis (Model 2) did not find an effect of  
286 school session on dengue diagnoses.

287  
288 **Fig 3. Temporal Seasonality.** The temporal seasonality (Model 1) predictions for daily diagnoses exhibit  
289 an annual seasonality peaking in April.

290

291 **Fig 4. Day-of-Week Effects.** The effect of the day of the week on dengue fever diagnoses is summarized  
292 in this graph, comparing each day to the overall average effect of weekday. A null estimate (RR=1.0) is  
293 included as a reference. Effect estimates are derived from Model 1. CI=confidence interval.

294  
295 Most climate variables exhibited small but significant effects on risk of dengue fever diagnoses. Greater  
296 total monthly precipitation (RR: 2.14, 95% CI 1.26—3.64,  $p=0.005$ ) result in increases in dengue fever  
297 diagnoses. In addition, there were significant interactions between total monthly precipitation and  
298 monthly absolute minimum temperature (RR: 0.93, 95% CI 0.88—0.98,  $p=0.05$ ), as well as total monthly  
299 precipitation and the days per month with precipitation (RR: 0.90, 95% CI 0.82—0.99,  $p=0.027$ ). A three-  
300 way interaction between monthly absolute minimum temperature, total monthly precipitation, and  
301 days per month with precipitation was also noted (RR: 1.01, 95% CI 1.00—1.02,  $p=0.023$ ). Model 3  
302 predictions of interaction variable effects are in Fig 5, wherein observed values for monthly absolute  
303 minimum temperature, total monthly precipitation, and days per month with precipitation were used to  
304 predict the number of dengue cases per month within a reasonable range of precipitation and minimum  
305 temperature values. At an absolute minimum temperatures of 18—19° C, the predicted number of cases  
306 increased (5 to 15 cases per month) as total monthly precipitation increased (from 125 to 875 mm per  
307 month) and *decreased* as the number of days with precipitation increased (from 5 to 30 days per  
308 month), but as minimum temperatures warm, the direction of these relationships changes. When the  
309 absolute minimum temperature is 20° C, additional days with precipitation or increases in monthly  
310 amounts of precipitation have little effect on the number of diagnoses. For a monthly minimum  
311 temperature of 21—22° C, the effect of increased amounts of precipitation is weaker, but still positive,  
312 while the impact of number of days with precipitation at warmer temperatures leads to *increases* in the  
313 number of dengue diagnoses (from 2 to 10 cases per month).

314

315 **Fig 5. Interactions Between Monthly Precipitation and Monthly Minimum Temperature** Within  
316 individual plot panels, number of days with precipitation increase along the x-axis while monthly  
317 predicted number of dengue cases increase along the y-axis. Absolute minimum temperature levels  
318 increase along panel columns from left to right, and monthly amounts of precipitation increase along  
319 panel rows from bottom to top. Increases in the amount of precipitation leads to increases in the  
320 number of dengue diagnoses for all temperature conditions, but the relationship between temperature  
321 and number of days with precipitation exhibits an overall U-shaped pattern. As the minimum  
322 temperature warms, the relationship between number of days with precipitation and number of dengue  
323 diagnoses changes from negative to positive. At lower temperatures (18–19° C), additional days with  
324 precipitation lead to decreases in the predicted number of dengue cases. At 20° C, the relationship is  
325 flat, and at warmer temperatures (21–22° C), additional days with precipitation lead to increases in the  
326 number of dengue cases. Effect estimates were obtained from Model 3. T=monthly minimum  
327 temperature, mm=millimeters, C=Celsius.

328

## 329 **Discussion**

330 Understanding the seasonality of infectious diseases can be crucial to the public health efforts to control  
331 these diseases. Seasonality is a major determinant of vaccination scheduling, timing of educational  
332 campaigns, and allocation of resources. In this paper, we examine temporal (long-term trends, intra-  
333 annual patterns, day-of-week and holiday effects) and climate components of seasonality.

334 Our data exhibits annual peaks in dengue fever diagnoses, occurring in late March or early April. The  
335 model also included a long-term trend suggesting high-intensity dengue fever seasons followed by a  
336 low-intensity season or seasons the following two years (three-year peak). These inter-epidemic periods  
337 have been observed in long-term studies of dengue seasonality in coastal Ecuador as well as other  
338 countries. Coastal Ecuador exhibits significant annual and two-year peaks in dengue incidence [20];



339 additional studies indicate that El Niño events, which occur in variable annual or multi-year patterns,  
340 may also influence dengue incidence patterns [19]. Our data exhibits peaks in 2012, and 2015; 2009 and  
341 2015 were moderate and very strong were El Niño years, respectively [60]. Research from Peru suggests  
342 annual and three-year peaks in dengue incidence [61], while Colombia experiences two- to five-year  
343 cycles [62], with some parts of Colombia lacking annual disease peaks [63]. The long-term pattern of this  
344 data exhibited a decrease in the average frequency of diagnoses (from one case every 3.2 days to one  
345 case every 10 days). This could be an actual decrease in disease diagnoses (perhaps due to  
346 improvements in mosquito-control practices during the study period) or may be the product of  
347 worsening economic conditions in Ecuador (which would affect the ability of patients to seek  
348 healthcare). In addition, a major earthquake in April 2016 disrupted many services in Ecuador, including  
349 transportation, utilities, and healthcare for several weeks, which may have disrupted the typical  
350 healthcare-seeking behavior of patients and the diagnostic capabilities of the hospitals during this time.  
351 In this dataset, dengue fever diagnoses were likely affected by healthcare-seeking behavior. The  
352 decision and timing of seeking care for health problems can be affected by short-term time trends  
353 including day-of-week and holiday patterns. This type of research is scarce in South America. In the US  
354 and the UK, research on day-of-week effects has found that patients are less likely to visit the hospital  
355 on a weekend and that weekend hospital visits tend to be non-elective [64, 65], suggesting that patients  
356 may put off healthcare for less serious health conditions. Our findings agree with previous research,  
357 with Saturdays and Sundays being the least likely days for dengue fever diagnosis. However, we  
358 additionally found an increase in diagnoses on Tuesdays and Thursdays. We speculate that there may be  
359 some underlying pattern to diagnostic capabilities (e.g. staffing patterns, shipment days for lab supplies,  
360 or a backlog of patient samples from the weekend). We also examined holidays, with the reasoning that  
361 patients would also delay healthcare until after holidays. Previous studies suggest that holiday effects  
362 may be complex: research from Colombia has shown increases in dengue during periods immediately

363 following holidays, from patients travelling to dengue-endemic areas during the holidays [66]. In our  
364 study, the individual holidays largely had no effect on dengue diagnoses, except for the day after  
365 Christmas ( $p=0.0015$ ), when patients were more likely to be diagnosed with dengue fever. Since the  
366 incubation period for dengue is 4–10 days, this spike in diagnoses would support the hypothesis that  
367 who became ill over the holiday delayed their care, rather than acquired their illness during holiday  
368 travel.

369 In our seasonality assessment, we found that dengue fever diagnoses during late March/early April. This  
370 is the first assessment of dengue fever seasonality in rural Ecuador. Reports from nearby Colombia  
371 regarding dengue fever seasonality have not found an annual seasonal pattern for dengue incidence [63,  
372 67], though these studies did not utilize sinusoidal variables, making it difficult to detect these patterns.  
373 Climatic factors such as temperature or precipitation can affect the survival and distribution of mosquito  
374 vectors and the transmissibility of pathogens from these vectors [16-18]. In previous research in  
375 Colombia, studies have found average temperature, changes in average temperature, average relative  
376 humidity, total precipitation, and El Niño events to be major predictors of dengue incidence [63, 68].  
377 Research in Ecuador has been limited to studies of dengue cases in coastal regions. In one study,  
378 minimum weekly temperature and weekly average precipitation were shown to be strongly linked to  
379 weekly number of dengue cases [20]. Minimum weekly temperature, precipitation, and El Niño events  
380 were also positively associated with dengue risk [19]. Our data illustrate a complex relationship between  
381 climate factors and dengue fever diagnoses. Temperature is a major factor; dengue transmission is  
382 sensitive to extremes of temperature as *Aedes aegypti* propagate and transmit dengue best between  
383 18–32° C [63], but precipitation is also important. In isolation, total monthly precipitation and number  
384 of days with precipitation had opposite effects, suggesting that sufficient precipitation is necessary for  
385 dengue cases to occur, but that too many days with precipitation decrease risk. However, when we  
386 consider minimum monthly temperature, temperature modifies the effects of precipitation in a U-

387 shaped pattern. All amounts of precipitation drive increases in dengue diagnoses but additional days  
388 with precipitation lead to decreases in dengue diagnoses while when temperatures are lowest, as in the  
389 months of July through November (mean minimum temperatures of 19.0–19.7° C). During these  
390 months precipitation amounts are all below 250 mm on average and durations are 11.7 to 15.7 days on  
391 average, resulting in a relatively low predicted number of dengue fever cases. At warmer temperatures,  
392 both number of days with and amount of precipitation have positive relationships with the number of  
393 dengue diagnoses. At the warmer part of the year – *i.e.* December through June (mean minimum  
394 temperatures of 19.8–21.2° C), precipitation quantity is higher (mean 271.6–635.4 mm per month)  
395 and occurs on more days (mean 21.6–28.3 days per month).

396 Our results likely reflect the effect of precipitation on mosquitoes: female *Aedes aegypti* mosquitoes  
397 tend to lay eggs just above the water surface in containers or pools [69] until additional precipitation  
398 (*i.e.* flooding of the eggs) causes the eggs to hatch, but too much precipitation can wash eggs or larvae  
399 out of their containers [70], meaning some dry periods are necessary or even beneficial to *Aedes aegypti*  
400 abundance. Previous research has found that *Aedes aegypti* breeding site occupancy is increased at sites  
401 with longer dry periods [71]. Temperature levels affect evaporation rates and the durability of standing  
402 water (*i.e.* breeding and development sites); this may explain temperature’s modifying impact on the  
403 relationship between precipitation and dengue diagnoses.

404 Human hosts may also change their travel outside the home during consistently rainy periods, which  
405 may alter their exposure to dengue-infected mosquitoes (depending on where they are most exposed).  
406 Research in Australia found that virus acquisition was spatiotemporally linked to the case’s residence in  
407 42% of dengue cases [72], though this proportion may differ in other geographic locations. Human  
408 movement and behavior is a major component of dengue fever risk [73]. Weather patterns affect  
409 human movements, with high movement variation on days with higher precipitation [74]. The patterns

410 between dengue fever risk and climate variables observed in our data are likely a combination of the  
411 effect of climate on mosquito vectors and human behaviors.

## 412 **Limitations**

413 This dataset represents dengue fever diagnoses in the community and is only a proxy for dengue fever  
414 incidence rates. There are likely to be many more cases dengue fever in the community: 80% of dengue  
415 cases are estimated to be asymptomatic, some symptomatic patients may never seek care, and some  
416 symptomatic patients may have sought care at hospitals other than those included in this study. This  
417 could be a potential source of selection bias. However, our study hospitals are the major source of care  
418 in their communities and we are assessing seasonality and climate variables; we have no reason to  
419 believe that the effect of seasonality and climate is any different among symptomatic versus  
420 asymptomatic patients nor for the small number of persons who sought care at other clinics. The effect  
421 of selection bias on these data is likely minimal.

422 Dengue diagnosis can be difficult even for experienced clinicians, especially in a resource-limited setting  
423 such as Ecuador. Not all patients with a final dengue diagnosis were necessarily lab-confirmed; the use a  
424 laboratory confirmation likely varies by clinician, patient, and presenting symptoms, though the  
425 clinicians at the study hospitals are all experienced with dengue diagnosis. Because not all cases were  
426 laboratory-confirmed, it is possible that some non-dengue cases were diagnosed as dengue, particularly  
427 when chikungunya was introduced to Ecuador (late 2015) and no diagnostic tools were available for  
428 chikungunya. However, because chikungunya and dengue are spread by the same mosquito species,  
429 *Aedes aegypti*, and exhibit the same symptoms, we expect that the effects of seasonality and climate on  
430 to be the same for both chikungunya and dengue.

431 Our dataset only covers a seven-year period making it difficult to conclude if our observations truly  
432 reflect long-term or multi-year disease trends in this community. Additional research for longer periods

433 of time will reveal if a two- or three-year long-term peaks or decreases in dengue fever diagnoses are  
434 present in this community.

435 Available climate data was captured from a climatological station located 39 and 36 kilometers from  
436 Hospital Pedro Vicente and Hospital Saludes, respectively. These data are only a proxy for actual  
437 climate conditions in our communities of interest. In addition, analyses with climate variables were  
438 limited to monthly summaries of these variables, making it difficult to ascertain if the relationships  
439 discovered in this research reflect the true relationship between climate variables and dengue fever  
440 diagnoses in these populations. Under the assumption that most patients would be bitten, experience  
441 symptoms, and seek care within the same month, the climate-diagnosis relationships presented in this  
442 study are a good estimate of dengue seasonality in these communities. In reality, there is considerable  
443 variation among the climate variables, mosquito exposure and dengue diagnoses in this community,  
444 which we were unable to capture in this study. Nor are we able to estimate the effects of climate  
445 variable interactions among ranges and combinations of variables that were unobserved in this location.  
446 Future research will address this gap with on-the-ground climate loggers and additional research in  
447 areas with different climate conditions.

448

## 449 **Acknowledgements**

450 Thank you to the information technology staff at Hospital Pedro Vicente Maldonado and Dr. Daniel  
451 Larco for explanation of diagnostic methods at the sites.

452

## 453 **References**

454

- 455 1. Bloom-Feshbach K, Alonso WJ, Charu V, Tamerius J, Simonsen L, Miller MA, et al. Latitudinal  
456 variations in seasonal activity of influenza and respiratory syncytial virus (RSV): a global comparative  
457 review. PLoS One. 2013;8(2):e54445. doi: 10.1371/journal.pone.0054445. PubMed PMID: 23457451;  
458 PubMed Central PMCID: PMC3573019.

- 459 2. Oliveira CR, Costa GS, Paploski IA, Kikuti M, Kasper AM, Silva MM, et al. Influenza-like illness in  
460 an urban community of Salvador, Brazil: incidence, seasonality and risk factors. *BMC Infect Dis.*  
461 2016;16:125. doi: 10.1186/s12879-016-1456-8. PubMed PMID: 26975185; PubMed Central PMCID:  
462 PMC4791800.
- 463 3. Saha S, Chadha M, Al Mamun A, Rahman M, Sturm-Ramirez K, Chittaganpitch M, et al. Influenza  
464 seasonality and vaccination timing in tropical and subtropical areas of southern and south-eastern Asia.  
465 *Bull World Health Organ.* 2014;92(5):318-30. doi: 10.2471/BLT.13.124412. PubMed PMID: 24839321;  
466 PubMed Central PMCID: PMC4007122.
- 467 4. Tamerius J, Nelson MI, Zhou SZ, Viboud C, Miller MA, Alonso WJ. Global influenza seasonality:  
468 reconciling patterns across temperate and tropical regions. *Environ Health Perspect.* 2011;119(4):439-  
469 45. doi: 10.1289/ehp.1002383. PubMed PMID: 21097384; PubMed Central PMCID: PMC3080923.
- 470 5. Tang JW, Ngai KL, Lam WY, Chan PK. Seasonality of influenza A(H3N2) virus: a Hong Kong  
471 perspective (1997-2006). *PLoS One.* 2008;3(7):e2768. doi: 10.1371/journal.pone.0002768. PubMed  
472 PMID: 18648550; PubMed Central PMCID: PMC2481298.
- 473 6. Thai PQ, Choisy M, Duong TN, Thiem VD, Yen NT, Hien NT, et al. Seasonality of absolute  
474 humidity explains seasonality of influenza-like illness in Vietnam. *Epidemics.* 2015;13:65-73. doi:  
475 10.1016/j.epidem.2015.06.002. PubMed PMID: 26616043.
- 476 7. Reiner RC, Jr., Geary M, Atkinson PM, Smith DL, Gething PW. Seasonality of *Plasmodium*  
477 *falciparum* transmission: a systematic review. *Malar J.* 2015;14:343. doi: 10.1186/s12936-015-0849-2.  
478 PubMed PMID: 26370142; PubMed Central PMCID: PMC4570512.
- 479 8. Stewart Ibarra AM, Ryan SJ, Beltran E, Mejia R, Silva M, Munoz A. Dengue vector dynamics  
480 (*Aedes aegypti*) influenced by climate and social factors in Ecuador: implications for targeted control.  
481 *PLoS One.* 2013;8(11):e78263. doi: 10.1371/journal.pone.0078263. PubMed PMID: 24324542; PubMed  
482 Central PMCID: PMC3855798.
- 483 9. You S, Tong YW, Neoh KG, Dai Y, Wang CH. On the association between outdoor PM2.5  
484 concentration and the seasonality of tuberculosis for Beijing and Hong Kong. *Environ Pollut.* 2016. doi:  
485 10.1016/j.envpol.2016.08.071. PubMed PMID: 27595179.
- 486 10. Wingfield T, Schumacher SG, Sandhu G, Tovar MA, Zevallos K, Baldwin MR, et al. The seasonality  
487 of tuberculosis, sunlight, vitamin D, and household crowding. *J Infect Dis.* 2014;210(5):774-83. doi:  
488 10.1093/infdis/jiu121. PubMed PMID: 24596279; PubMed Central PMCID: PMC4130318.
- 489 11. Hogan AB, Anderssen RS, Davis S, Moore HC, Lim FJ, Fathima P, et al. Time series analysis of RSV  
490 and bronchiolitis seasonality in temperate and tropical Western Australia. *Epidemics.* 2016;16:49-55.  
491 doi: 10.1016/j.epidem.2016.05.001. PubMed PMID: 27294794.
- 492 12. Chakraborty A, Komatsu K, Roberts M, Collins J, Beggs J, Turabelidze G, et al. The descriptive  
493 epidemiology of yersiniosis: a multistate study, 2005-2011. *Public Health Rep.* 2015;130(3):269-77.  
494 PubMed PMID: 25931631; PubMed Central PMCID: PMC4388225.
- 495 13. Ravel A, Smolina E, Sargeant JM, Cook A, Marshall B, Fleury MD, et al. Seasonality in human  
496 salmonellosis: assessment of human activities and chicken contamination as driving factors. *Foodborne*  
497 *Pathog Dis.* 2010;7(7):785-94. doi: 10.1089/fpd.2009.0460. PubMed PMID: 20184452.
- 498 14. Wilson E. Foodborne illness and seasonality related to mobile food sources at festivals and  
499 group gatherings in the state of Georgia. *J Environ Health.* 2015;77(7):8-11; quiz 54. PubMed PMID:  
500 25796696.
- 501 15. Lal A, Hales S, French N, Baker MG. Seasonality in human zoonotic enteric diseases: a systematic  
502 review. *PLoS One.* 2012;7(4):e31883. doi: 10.1371/journal.pone.0031883. PubMed PMID: 22485127;  
503 PubMed Central PMCID: PMC3317665.
- 504 16. Zouache K, Fontaine A, Vega-Rua A, Mousson L, Thiberge JM, Lourenco-De-Oliveira R, et al.  
505 Three-way interactions between mosquito population, viral strain and temperature underlying

- 506 chikungunya virus transmission potential. *Proc Biol Sci.* 2014;281(1792). doi: 10.1098/rspb.2014.1078.  
507 PubMed PMID: 25122228; PubMed Central PMCID: PMC4150320.
- 508 17. Dhimal M, Gautam I, Joshi HD, O'Hara RB, Ahrens B, Kuch U. Risk factors for the presence of  
509 chikungunya and dengue vectors (*Aedes aegypti* and *Aedes albopictus*), their altitudinal distribution and  
510 climatic determinants of their abundance in central Nepal. *PLoS Negl Trop Dis.* 2015;9(3):e0003545. doi:  
511 10.1371/journal.pntd.0003545. PubMed PMID: 25774518; PubMed Central PMCID: PMC4361564.
- 512 18. Goindin D, Delannay C, Ramdini C, Gustave J, Fouque F. Parity and longevity of *Aedes aegypti*  
513 according to temperatures in controlled conditions and consequences on dengue transmission risks.  
514 *PLoS One.* 2015;10(8):e0135489. doi: 10.1371/journal.pone.0135489. PubMed PMID: 26258684;  
515 PubMed Central PMCID: PMC4530937.
- 516 19. Stewart-Ibarra AM, Lowe R. Climate and non-climate drivers of dengue epidemics in southern  
517 coastal Ecuador. *Am J Trop Med Hyg.* 2013;88(5):971-81. doi: 10.4269/ajtmh.12-0478. PubMed PMID:  
518 23478584; PubMed Central PMCID: PMC3752767.
- 519 20. Stewart-Ibarra AM, Munoz AG, Ryan SJ, Ayala EB, Borbor-Cordova MJ, Finkelstein JL, et al.  
520 Spatiotemporal clustering, climate periodicity, and social-ecological risk factors for dengue during an  
521 outbreak in Machala, Ecuador, in 2010. *BMC Infect Dis.* 2014;14:610. doi: 10.1186/s12879-014-0610-4.  
522 PubMed PMID: 25420543; PubMed Central PMCID: PMC4264610.
- 523 21. Waldock J, Chandra NL, Lelieveld J, Proestos Y, Michael E, Christophides G, et al. The role of  
524 environmental variables on *Aedes albopictus* biology and chikungunya epidemiology. *Pathog Glob*  
525 *Health.* 2013;107(5):224-41. doi: 10.1179/2047773213Y.0000000100. PubMed PMID: 23916332;  
526 PubMed Central PMCID: PMC4001452.
- 527 22. Forshey BM, Guevara C, Laguna-Torres VA, Cespedes M, Vargas J, Gianella A, et al. Arboviral  
528 etiologies of acute febrile illnesses in Western South America, 2000-2007. *PLoS Negl Trop Dis.*  
529 2010;4(8):e787. doi: 10.1371/journal.pntd.0000787. PubMed PMID: 20706628; PubMed Central PMCID:  
530 PMC2919378.
- 531 23. Ten Bosch QA, Clapham HE, Lambrechts L, Duong V, Buchy P, Althouse BM, et al. Contributions  
532 from the silent majority dominate dengue virus transmission. *PLoS Pathog.* 2018;14(5):e1006965. doi:  
533 10.1371/journal.ppat.1006965. PubMed PMID: 29723307; PubMed Central PMCID: PMC5933708.
- 534 24. Patterson J, Sammon M, Garg M. Dengue, Zika and Chikungunya: Emerging Arboviruses in the  
535 New World. *West J Emerg Med.* 2016;17(6):671-9. doi: 10.5811/westjem.2016.9.30904. PubMed PMID:  
536 27833670; PubMed Central PMCID: PMC5102589.
- 537 25. Cavailer P, Tarantola A, Leo YS, Lover AA, Rachline A, Duch M, et al. Early diagnosis of dengue  
538 disease severity in a resource-limited Asian country. *BMC Infect Dis.* 2016;16(1):512. doi:  
539 10.1186/s12879-016-1849-8. PubMed PMID: 27670906; PubMed Central PMCID: PMC5036306.
- 540 26. Paynter S, Ware RS, Sly PD, Williams G, Weinstein P. Seasonal immune modulation in humans:  
541 observed patterns and potential environmental drivers. *J Infect.* 2015;70(1):1-10. doi:  
542 10.1016/j.jinf.2014.09.006. PubMed PMID: 25246360.
- 543 27. Dopico XC, Evangelou M, Ferreira RC, Guo H, Pekalski ML, Smyth DJ, et al. Widespread seasonal  
544 gene expression reveals annual differences in human immunity and physiology. *Nat Commun.*  
545 2015;6:7000. doi: 10.1038/ncomms8000. PubMed PMID: 25965853; PubMed Central PMCID:  
546 PMC4432600.
- 547 28. Liu B, Taioli E. Seasonal Variations of Complete Blood Count and Inflammatory Biomarkers in the  
548 US Population - Analysis of NHANES Data. *PLoS One.* 2015;10(11):e0142382. doi:  
549 10.1371/journal.pone.0142382. PubMed PMID: 26544180; PubMed Central PMCID: PMC4636256.
- 550 29. Mordecai EA, Cohen JM, Evans MV, Gudapati P, Johnson LR, Lippi CA, et al. Detecting the impact  
551 of temperature on transmission of Zika, dengue, and chikungunya using mechanistic models. *PLoS Negl*  
552 *Trop Dis.* 2017;11(4):e0005568. doi: 10.1371/journal.pntd.0005568. PubMed PMID: 28448507; PubMed  
553 Central PMCID: PMC5423694.

- 554 30. Pant CP, Yasuno M. Field studies on the gonotrophic cycle of *Aedes aegypti* in Bangkok,  
555 Thailand. *J Med Entomol.* 1973;10:219-23.
- 556 31. Rueda LM, Patel KJ, Axtell RC, Stinner RE. Temperature-dependent development and survival  
557 rates of *Culex quinquefasciatus* and *Aedes aegypti* (Diptera: Culicidae). *J Med Entomol.* 1990;27:892-8.
- 558 32. Tun-Lin W, Burkot TR, Kay BH. Effects of temperature and larval diet on development rates and  
559 survival of the dengue vector *Aedes aegypti* in north Queensland, Australia. *Med Vet Entomol.*  
560 2000;14:31-7.
- 561 33. Yasuno M, Tonn RJ. A study of biting habits of *Aedes aegypti* in Bangkok, Thailand. *Bull World*  
562 *Health Organ.* 1970;43:319-25.
- 563 34. Bar-Zeev M. The effect of temperature on the growth rate and survival of the immature stages  
564 of *Aedes aegypti* (L.). *Bull Entomol Res.* 1958;49:157-63.
- 565 35. Eisen L, Monaghan AJ, Lozano-Fuentes S, Steinhoff DF, Hayden MH, Bieringer PE. The impact of  
566 temperature on the bionomics of *Aedes (Stegomyia) aegypti*, with special reference to the cool  
567 geographic range margins. *J Med Entomol.* 2014;51:496-516.
- 568 36. Focks DA, Haile DG, Daniels E, Mount GA. Dynamic life table model for *Aedes aegypti* (Diptera:  
569 Culicidae): analysis of the literature and model development. *J Med Entomol.* 1993;30:1003-17.
- 570 37. Nagao Y, Thavara U, Chitnumsup P, Tawatsin A, Chansang C, Campbell-Lendrum D. Climatic and  
571 social risk factors for *Aedes* infestation in rural Thailand. *Trop Med Int Health.* 2003;8(7):650-9.
- 572 38. Prado GP, Maciel JP, Leite GR, Souza MAA. Influence of shading and pedestrian traffic on the  
573 preference of *Aedes (Stegomyia) aegypti* (Diptera: Culicidae) for oviposition microenvironments. *J*  
574 *Vector Ecol.* 2017;42(1):155-60.
- 575 39. Resende MC, Silva IM, Ellis BR, Eiras AE. A comparison of larval, ovitrap and MosquiTRAP  
576 surveillance for *Aedes (Stegomyia) aegypti*. *Mem Inst Oswaldo Cruz.* 2013;108(8):1024-30. doi:  
577 10.1590/0074-0276130128. PubMed PMID: 24402144; PubMed Central PMCID: PMC4005541.
- 578 40. Simoes TC, Codeco CT, Nobre AA, Eiras AE. Modeling the non-stationary climate dependent  
579 temporal dynamics of *Aedes aegypti*. *PLoS One.* 2013;8(8):e64773. doi: 10.1371/journal.pone.0064773.  
580 PubMed PMID: 23976939; PubMed Central PMCID: PMC3748059.
- 581 41. Merkel A. Climate: Ecuador: Climate-Data.org; 2012 [cited 2016 June 1, 2016]. Available from:  
582 <https://en.climate-data.org/south-america/ecuador-63/>.
- 583 42. Lyon B, Barnston AG. ENSO and the Spatial Extent of Interannual Precipitation Extremes in  
584 Tropical Land Areas. *Journal of Climate* 2005;18:5095-109.
- 585 43. Ministerio de Turismo. Calendario de Feriados 2012 [cited 2016 10 December]. Available from:  
586 <http://www.turismo.gob.ec/calendario-de-feriados/>.
- 587 44. Calendario de feriados del 2010. *El Universo.* 22 December 2009.
- 588 45. Presidente Correa dispone los feriados hasta el año 2011. *Ecuador Inmediato.* 16 June 2007.
- 589 46. Diez días serán feriados en el 2009. *La Hora.* 30 December 2008.
- 590 47. Boletines meteorológicos históricos [Internet]. Gobierno Nacional de la Republica del Ecuador.  
591 [cited 10 December 2016]. Available from:  
592 <http://www.serviciometeorologico.gob.ec/meteorologia/bolhist/cli/>.
- 593 48. Instituto Nacional de Meteorología e Hidrología. Anuarios Meteorológico. In: Hidrología INdMe,  
594 editor. Quito, Ecuador: Gobierno Nacional de la Republica del Ecuador.
- 595 49. Harrell FE. DASPLINE Macro. Available from:  
596 <http://biostat.mc.vanderbilt.edu/twiki/pub/Main/SasMacros/survrisk.txt>.
- 597 50. Whitlock I, Rohrbough R. weekno Macro. Available from:  
598 <https://groups.google.com/forum/#!topic/comp.soft-sys.sas/OCMjn9KYcc8>.
- 599 51. R Core Team. R: A Language and Environment for Statistical Computing. In: Computing RFFS,  
600 editor. 3.2.2 ed. Vienna, Austria 2013.
- 601 52. Hijmans RJ, Phillips S, Leathwick J, Elith J. *dismo: Species Distribution Modeling.* 1.1-4 ed 2017.



- 602 53. Hijmans RJ, van Etten J, Cheng J, Mattiuzzi M, Sumner M, Greenberg JP, et al. raster: Geographic  
603 Data Analysis and Modeling. 2.5-8 ed2016.
- 604 54. Kahle D, Wickham H. ggmap: Spatial Visualization with ggplot2. 2.6.1 ed2016.
- 605 55. Pebesma E, Bivand R, Rowlingson B, Gomez-Rubio V, Hijmans RJ, Sumner M, et al. sp: Classes  
606 and Methods for Spatial Data. 1.2-4 ed2016.
- 607 56. Wickham H, Miller E. haven: Import and Export 'SPSS', 'Stata' and 'SAS' Files. R package version  
608 1.1.0 ed2017.
- 609 57. Fellows I. OpenStreetMap: Access to Open Street Map Raster Images. 0.3.3 ed2016.
- 610 58. Hajsgaard S, Halekoh U, Yan J. The R Package geePack for Generalized Estimating Equations  
611 Journal of Statistical Software. 2006;15(2):1-11.
- 612 59. Venables WN, Ripley BD. Modern Applied Statistics with S. 4th Edition ed. New York: Springer;  
613 2002.
- 614 60. Null J. El Niño and La Niña Years and Intensities: Golden Gate Weather Services; 2018 [15 Feb  
615 2016]. Available from: <http://ggweather.com/enso/oni.htm>.
- 616 61. Stoddard ST, Wearing HJ, Reiner RC, Jr., Morrison AC, Astete H, Vilcarrromero S, et al. Long-Term  
617 and Seasonal Dynamics of Dengue in Iquitos, Peru. PLoS Negl Trop Dis. 2014;8(7):e3003. doi:  
618 10.1371/journal.pntd.0003003.
- 619 62. Fernandez-Nino JA, Cardenas-Cardenas LM, Hernandez-Avila JE, Palacio-Mejia LS, Castaneda-  
620 Orjuela CA. Exploratory wavelet analysis of dengue seasonal patterns in Colombia. Biomedica.  
621 2015;36(0):44-55. doi: 10.7705/biomedica.v36i0.2869. PubMed PMID: 27622792.
- 622 63. Eastin MD, Delmelle E, Casas I, Wexler J, Self C. Intra- and interseasonal autoregressive  
623 prediction of dengue outbreaks using local weather and regional climate for a tropical environment in  
624 Colombia. Am J Trop Med Hyg. 2014;91(3):598-610. doi: 10.4269/ajtmh.13-0303. PubMed PMID:  
625 24957546; PubMed Central PMCID: PMC4155567.
- 626 64. Ryan K, Levit K, Davis PH. Characteristics of Weekday and Weekend Hospital Admissions:  
627 Statistical Brief #87. Healthcare Cost and Utilization Project (HCUP) Statistical Briefs. Rockville  
628 (MD)2006.
- 629 65. Meacock R, Anselmi L, Kristensen SR, Doran T, Sutton M. Higher mortality rates amongst  
630 emergency patients admitted to hospital at weekends reflect a lower probability of admission. J Health  
631 Serv Res Policy. 2016. doi: 10.1177/1355819616649630. PubMed PMID: 27255144.
- 632 66. Chaparro PE, de la Hoz F, Lozano Becerra JC, Repetto SA, Alba Soto CD. Internal travel and risk of  
633 dengue transmission in Colombia. Rev Panam Salud Publica. 2014;36(3):197-200. PubMed PMID:  
634 25418771.
- 635 67. Restrepo BN, Beatty ME, Goez Y, Ramirez RE, Letson GW, Diaz FJ, et al. Frequency and clinical  
636 manifestations of dengue in urban medellin, Colombia. J Trop Med. 2014;2014:872608. doi:  
637 10.1155/2014/872608. PubMed PMID: 24987421; PubMed Central PMCID: PMC4060062.
- 638 68. Restrepo AC, Baker P, Clements AC. National spatial and temporal patterns of notified dengue  
639 cases, Colombia 2007-2010. Trop Med Int Health. 2014;19(7):863-71. doi: 10.1111/tmi.12325. PubMed  
640 PMID: 24862214.
- 641 69. Madeira NG, Macharelli CA, Carvalho LR. Variation of the oviposition preferences of *Aedes*  
642 *aegypti* in function of substratum and humidity. Mem Inst Oswaldo Cruz. 2002;97(3):415-20. PubMed  
643 PMID: 12048575.
- 644 70. Koenraadt CJ, Harrington LC. Flushing effect of rain on container-inhabiting mosquitoes *Aedes*  
645 *aegypti* and *Culex pipiens* (Diptera: Culicidae). J Med Entomol. 2008;45(1):28-35. PubMed PMID:  
646 18283939.
- 647 71. Juliano SA, O'Meara GF, Morrill JR, Cutwa MM. Desiccation and thermal tolerance of eggs and  
648 the coexistence of competing mosquitoes. Oecologia. 2002;130(3):458-69. doi:  
649 10.1007/s004420100811. PubMed PMID: 20871747; PubMed Central PMCID: PMC42944657.

- 650 72. Vazquez-Prokopec GM, Montgomery BL, Horne P, Clennon JA, Ritchie SA. Combining contact  
651 tracing with targeted indoor residual spraying significantly reduces dengue transmission. *Sci Adv*.  
652 2017;3(2):e1602024. doi: 10.1126/sciadv.1602024. PubMed PMID: 28232955; PubMed Central PMCID:  
653 PMCPMC5315446.
- 654 73. Stoddard ST, Morrison AC, Vazquez-Prokopec GM, Paz Soldan V, Kochel TJ, Kitron U, et al. The  
655 role of human movement in the transmission of vector-borne pathogens. *PLoS Negl Trop Dis*.  
656 2009;3(7):e481. doi: 10.1371/journal.pntd.0000481. PubMed PMID: 19621090; PubMed Central PMCID:  
657 PMCPMC2710008.
- 658 74. Horanont T, Phithakkitnukoon S, Leong TW, Sekimoto Y, Shibasaki R. Weather effects on the  
659 patterns of people's everyday activities: a study using GPS traces of mobile phone users. *PLoS One*.  
660 2013;8(12):e81153. doi: 10.1371/journal.pone.0081153. PubMed PMID: 24367481; PubMed Central  
661 PMCID: PMCPMC3867318.
- 662

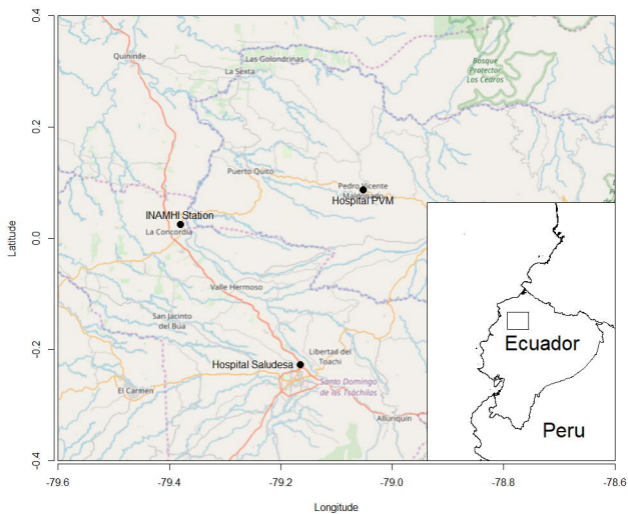

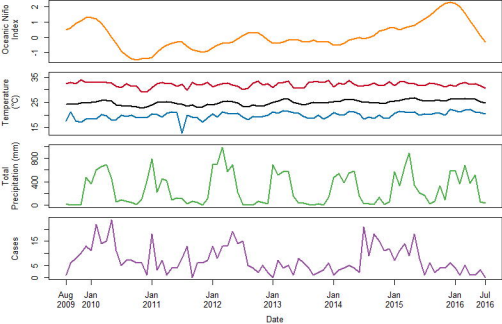

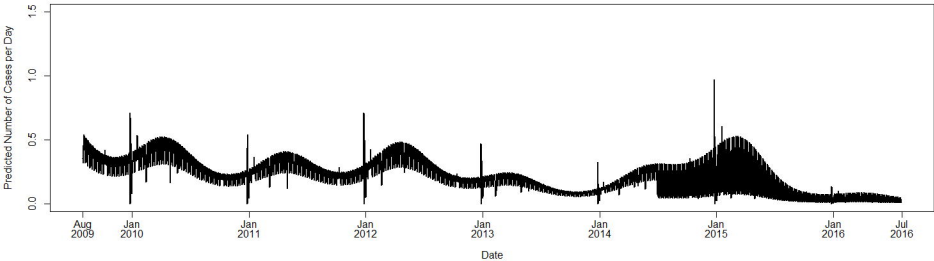

Relative Risk and 95% CI

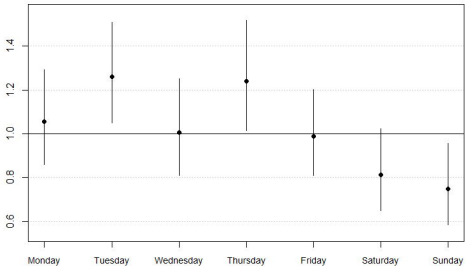

T=18 °C

T=19 °C

T=20 °C

T=21 °C

T=22 °C

875mm

625 mm

375 mm

125 mm

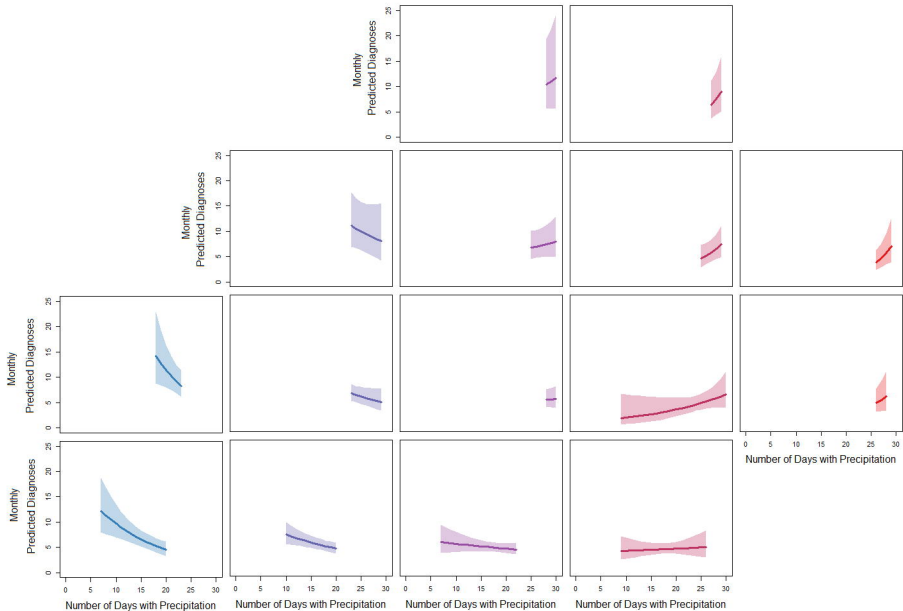

Number of Days with Precipitation
