1  
2  
3  
4  
5  
6  
7  
8  
9  
10  
11  
12  
13  
14  
15  
16  
17  
18  
19  
20  
21  
22  
23

## Seasonal patterns of dengue fever in rural Ecuador: 2009—2016

### Seasonality of dengue fever in Ecuador

Rachel Sippy<sup>1,2,#a</sup>, Diego Herrera<sup>3</sup>, David Gaus<sup>3</sup>, Ronald E. Gangnon<sup>1,4</sup>, Jonathan A. Patz<sup>1,5</sup>, and Jorge E. Osorio<sup>6\*</sup>

<sup>1</sup>Department of Population Health Sciences, University of Wisconsin-Madison, Madison, Wisconsin, United States of America

<sup>2</sup>Department of Family Medicine & Community Health, University of Wisconsin-Madison, Madison, Wisconsin, United States of America

<sup>3</sup>Salud y Desarrollo Andino, Pedro Vicente Maldonado, Pichincha, Ecuador

<sup>4</sup>Department of Biostatistics & Medical Informatics, University of Wisconsin-Madison, Madison, Wisconsin, United States of America

24 <sup>5</sup>Nelson Institute for Environmental Studies, University of Wisconsin-Madison, Madison, Wisconsin,  
25 United States of America

26

27 <sup>6</sup>Department of Pathobiological Sciences, University of Wisconsin-Madison, Madison, Wisconsin, United  
28 States of America

29

30 <sup>#a</sup>Current Address: Department of Medical Geography, University of Florida, Gainesville, Florida, United  
31 States of America

32

33

34 \* Corresponding author

35 Email: [jorge.osorio@wisc.edu](mailto:jorge.osorio@wisc.edu)

36

## 37 **Abstract**

38 Season is a major determinant of infectious disease rates, including arboviruses spread by mosquitoes,  
39 such as dengue, chikungunya, and Zika. Seasonal patterns of disease are driven by a combination of  
40 climatic or environmental factors, such as temperature or rainfall, and human behavioral time trends,  
41 such as school year schedules, holidays, and weekday-weekend patterns. These factors affect both  
42 disease rates and healthcare-seeking behavior. Seasonality of dengue fever has been studied in the  
43 context of climatic factors, but short- and long-term time trends are less well-understood. With 2009—  
44 2016 medical record data from patients diagnosed with dengue fever at two hospitals in rural Ecuador,  
45 we used Poisson generalized linear modeling to determine short- and long-term seasonal patterns of  
46 dengue fever, as well as the effect of day of the week and public holidays. In a subset analysis, we  
47 determined the impact of school schedules on school-aged children. With a separate model, we

48 examined the effect of climate on diagnosis patterns. In the first model, the most important predictors  
49 of dengue fever were annual sinusoidal fluctuations in disease, long-term trends (as represented by a  
50 spline for the full study duration), day of the week, and hospital. Seasonal trends showed single peaks in  
51 case diagnoses, during mid-March. Compared to the average of all days, cases were more likely to be  
52 diagnosed on Tuesdays (risk ratio (RR): 1.26, 95% confidence interval (CI) 1.05—1.51) and Thursdays (RR:  
53 1.25, 95% CI 1.02—1.53), and less likely to be diagnosed on Saturdays (RR: 0.81, 95% CI 0.65—1.01) and  
54 Sundays (RR: 0.74, 95% CI 0.58—0.95). Public holidays were not significant predictors of dengue fever  
55 diagnoses, except for an increase in diagnoses on the day after Christmas (RR: 2.77, 95% CI 1.46—5.24).  
56 School schedules did not impact dengue diagnoses in school-aged children. In the climate model,  
57 important climate variables included the monthly total precipitation, an interaction between total  
58 precipitation and monthly absolute minimum temperature, an interaction between total precipitation  
59 and monthly precipitation days, and a three-way interaction between minimum temperature, total  
60 precipitation, and precipitation days. This is the first report of long-term dengue fever seasonality in  
61 Ecuador, one of few reports from rural patients, and one of very few studies utilizing daily disease  
62 reports. These results can inform local disease prevention efforts, public health planning, as well as  
63 global and regional models of dengue fever trends.

64

## 65 **Author summary**

66 Dengue fever exhibits a seasonal pattern in many parts of the world, much of which has been attributed  
67 to climate and weather. However, additional factors may contribute to dengue seasonality. With 2009—  
68 2016 medical record data from rural Ecuador, we studied the short- and long-term seasonal patterns of  
69 dengue fever, as well as the effect of school schedules and public holidays. We also examined the effect  
70 of climate on dengue. We found that dengue diagnoses peak once per year in mid-March, but that  
71 diagnoses are also affected by day of the week. Dengue was also impacted by regional climate and

72 complex interactions between local weather variables. This is the first report of long-term dengue fever  
73 seasonality in Ecuador, one of few reports from rural patients, and one of very few studies utilizing daily  
74 disease reports. This is the first report on the impacts of school schedules, holidays, and weekday-  
75 weekend patterns on dengue diagnoses. These results suggest a potential impact of human behaviors  
76 on dengue exposure risk. More broadly, these results can inform local disease prevention efforts and  
77 public health planning, as well as global and regional models of dengue fever trends.

78

## 79 **Introduction**

80 Seasonality of infectious disease is a phenomenon commonly observed in the northern and southern  
81 hemispheres, with seasonality of influenza being the most well-known and well-studied infectious  
82 disease with a seasonal pattern [1-6]. Seasonality has also been observed with other infectious diseases,  
83 including malaria [7], dengue [8], tuberculosis [9, 10], acute respiratory infection [1, 11], and foodborne  
84 illness [12-15]. These relationships are often a combination of climatic and environmental factors and  
85 how these factors affect pathogen transmissibility [15, 16], vector abundance [8, 17-21], and human  
86 health, and drive human behaviors such as diet, crowding, travel patterns, and outdoor exposures [8,  
87 14, 15, 19, 20].

88 Mosquito-borne viral infections include dengue fever, yellow fever, chikungunya, and Zika, among  
89 others [22]. These illnesses are common in tropical countries and are most often spread by mosquitoes  
90 in the *Aedes* genus. Dengue virus is the most common, and may present with fever, rash, and general  
91 pain; although an estimated 80% of dengue patients are asymptomatic [23], this infection can have  
92 serious health consequences, including death [24].

93 The diagnosis of dengue and other acute febrile illnesses can be extremely difficult, depending on the  
94 stage of the illness and the resources available at the point of care. Dengue cannot always be  
95 distinguished from other febrile illnesses, though diagnostic testing, including rapid tests, ELISA, and

96 PCR-based assays are sometimes available and can aid with diagnosis [25], though the sensitivity and  
97 specificity of these tests are not perfect. Correct diagnosis of dengue additionally relies on the patient's  
98 presenting signs and symptoms as well as the expertise of the clinician.

99 Seasonality affects dengue diagnosis rates through several mechanisms. Seasons drive human behavior:  
100 people may be more or less likely to spend time crowded indoors or spread outdoors depending on the  
101 time of year, which affects exposure rates. This can be the result of weather conditions or a result of  
102 seasonal holidays, which affect school and work schedules, and drive public gatherings (such as parades)  
103 or private family gatherings. There is also reason to believe that seasonality affects host immunity: in  
104 tropical countries, both cell-mediated and humoral immune responses are decreased during the rainy  
105 season [26]. This could be driven by seasonal variation in gene expression [27], levels of immune-  
106 modulators and blood cell composition [28], food availability, daylight exposure, and/or environmental  
107 exposures [26], though the causal direction of changes in the immune system, season, and seasonal  
108 disease is unclear. In addition, long-term or multi-annual disease trends are often a reflection of a  
109 buildup of disease-specific immunity in a population: for outbreaks to occur, there must be a sufficient  
110 number of susceptible individuals in the population. If all persons in the community were infected in the  
111 previous years and are therefore immune to circulating strains of virus, no outbreak occurs and the  
112 season will have a relatively low intensity, and the low intensity will continue until additional  
113 susceptibles are available from birth, migration, or introduction of a new dengue serotype.

114 Climate is a major component of seasonality and directly impacts the life history and behavior of the  
115 mosquito vector. *Aedes aegypti*, which is the principal vector of dengue in Ecuador, has been well-  
116 characterized in its relationship to temperature, which has been shown to impact development rates,  
117 lifespan, fecundity, survival, biting rates, transmission probability, infection probability, abundance and  
118 incubation rates in both field and laboratory studies [29-36]. Field studies of rainfall have found  
119 associations between larval or adult abundance and precipitation [37-39]. Because temperature and

120 precipitation can affect mosquitoes throughout their life course, the temporal scale of climate-mosquito  
121 associations can vary, depending on the life stage of the mosquito. For example, lagged precipitation  
122 (one to two months prior) is linked to larval indices due to the impact of precipitation on larval breeding  
123 sites [37], while both lagged temperature (4 weeks) and unlagged [*i.e.* current] mean temperature have  
124 been associated with adult abundance [39, 40]. Adult abundance and biting patterns are critical to  
125 dengue risk; climate plays a major role in the activity levels of these vectors [33].

126 The climate of Ecuador is highly diverse; though small in area, it contains 11 different Köppen-Geiger  
127 climate classifications, with the coast being generally classified as hot and semi-arid or tropical savanna  
128 climates, the central Andean range as oceanic or warm-summer Mediterranean climates, and the  
129 eastern rainforest as tropical rainforest climates [41]. Ecuador is also impacted by the El Niño/Southern  
130 Oscillation (ENSO) phenomenon in which the surface temperature of the Pacific ocean leads to periodic  
131 changes in regional weather patterns [42]. Specifically, an El Niño year will be warmer and wetter than  
132 average in Ecuador, and a La Niña year will be drier and cooler than average [42].

133 Studies of disease seasonality in tropical regions are limited. For mosquito-borne disease, previous  
134 research has largely focused on climatic and environmental variables, which directly affect vector  
135 abundance. In Ecuador, this research has been limited to two studies of dengue cases in coastal regions;  
136 In one study, minimum weekly temperature and mean weekly precipitation were shown to be strongly  
137 linked to weekly number of dengue cases [19]. A second study in the same area found that minimum  
138 weekly temperature, precipitation, and El Niño events were positively associated with dengue risk [20].  
139 These studies both occurred in a large city the southern coast of Ecuador; given the diversity of climates  
140 and communities in Ecuador and the need for relevant evidence to make policy decisions, it is important  
141 to determine if the causal relationships between seasonal factors, climates, and dengue cases are similar  
142 in other areas of Ecuador.

143 With the present study we determined the seasonality of dengue fever by decomposing seasonality into  
144 two components: non-climate seasonality and climate-driven seasonality, using data from patients  
145 clinically diagnosed with dengue fever at two hospitals in rural Ecuador with a subtropical climate. Non-  
146 climate trends included short- and long-term trends, and the effects of school sessions, public holidays,  
147 and weekdays on these diagnoses. Climate-driven trends included an examination of regional and local  
148 climate variable impacts on dengue fever diagnoses.

## 149 **Methods**

### 150 **Study population & site**

151 Hospital Pedro Vicente Maldonado (HPVM) is a 17-bed rural hospital located in Pedro Vicente  
152 Maldonado (PVM), Pichincha, Ecuador (Fig 1). It primarily serves patients from Cantons Pedro Vicente  
153 Maldonado, Puerto Quito, San Miguel de los Bancos, and Santo Domingo. Pedro Vicente Maldonado is  
154 located at 0°05'12.3"N, 79°03'08.0"W, and northwest of Quito, at approximately 600 meters altitude,  
155 with a projected 2016 population of 6,944. Hospital Saludesá (HS) is a 60-bed metropolitan hospital  
156 located in Santo Domingo de los Tsáchilas (SD), Santo Domingo de los Tsáchilas, Ecuador (Fig 1). It serves  
157 patients from Santo Domingo de los Tsáchilas Province. Santo Domingo de los Tsáchilas is located at  
158 0°15'15"S, 79°10'19"W, and west of Quito, at approximately 550 meters altitude, with a population of  
159 305,632 (2010 Census). Both hospitals have 24-hour, 7-days-a-week emergency rooms, with regular  
160 consultation available on Mondays—Saturdays. During holidays, only the emergency room services are  
161 available. Both hospitals have clinical laboratory services available, including the NS1 dengue antigen  
162 rapid and dengue IgG antibody rapid tests (Human, Wiesbaden, Germany); the NS1 dengue antigen  
163 rapid test is the diagnostic of choice. These cities have a tropical rainforest climate; average monthly  
164 temperatures run from 71.8° Fahrenheit (22.1° Celsius) in November to 74.8° Fahrenheit (23.8° Celsius)  
165 in March. Average total monthly precipitation runs from 110 millimeters (mm) in July to 671 mm in  
166 April. Both sites have ongoing mosquito control programs. Cities are fumigated approximately once per

167 month with repellent, and residents are provided with temephos (Abate®) treatment for water stored in  
168 large laundry tanks.

169

170 **Fig 1. Study Site Locations.** This map depicts the locations of the two hospitals used in the study,  
171 Hospital Saludesá and Hospital Pedro Vicente Maldonado, as well as the climate station. Inset, coast of  
172 Ecuador, with a square marking the relative position of the larger map. PVM=Pedro Vicente Maldonado,  
173 INAMHI=Instituto Nacional de Meteorología e Hidrología. Basemap tiles by © OpenStreetMap  
174 contributors, under CC BY-SA (<https://www.openstreetmap.org/copyright>). Inset tiles from by © Stamen  
175 Design, under CC BY 3.0 ([maps.stamen.com](https://maps.stamen.com)). Maps were modified by R.S. for this manuscript.

176

## 177 **Data Collection**

178 For this medical record review, we examined de-identified records with a primary diagnosis of  
179 arthropod-borne viral fevers and viral hemorrhagic fevers. These included International Statistical  
180 Classification of Diseases and Related Health Problems, 10th Revision (ICD-10) codes A90–A99. Records  
181 from Hospital Pedro Vicente Maldonado included consult dates from August 1, 2009 through July 31,  
182 2016. Records from Hospital Saludesá included consult dates from July 1, 2014 through July 31, 2016.  
183 The following variables were available for analysis: consult date, primary diagnosis, ICD-10 code, and  
184 patient demographics (age, sex, insurance status, county-level address, weight, and height). We set  
185 criteria to exclude patients missing more than 50% of these variables. Information regarding school  
186 schedules and holiday dates in each year was obtained from the Ecuadorian Ministry of Education, the  
187 Ministry of Tourism and local residents [43-46]. School sessions and holidays analyzed in this study are in  
188 Table 1. Data for monthly climate variables measured at the La Concordia station (0°01'29.0"N,  
189 79°22'49.0"W, Fig 1) were obtained from the National Institute of Meteorology and Hydrology in  
190 Ecuador [47, 48]. Oceanic Niño Indices (ONI), a measure of ENSO effects, were obtained from the



191 National Weather Service  
 192 ([http://www.cpc.ncep.noaa.gov/products/analysis\\_monitoring/ensostuff/ensoyears.shtml](http://www.cpc.ncep.noaa.gov/products/analysis_monitoring/ensostuff/ensoyears.shtml)).

193

194 **Table 1. School Sessions & Holidays.**

| Event                                                            | Typical Date(s)                                                                                                                                               | Total Days in Dataset <sup>b</sup> |
|------------------------------------------------------------------|---------------------------------------------------------------------------------------------------------------------------------------------------------------|------------------------------------|
| School Semester                                                  | May 4 <sup>th</sup> —October 2 <sup>nd</sup> , October<br>12 <sup>th</sup> —December 23 <sup>rd</sup> , January<br>4 <sup>th</sup> —February 26 <sup>th</sup> | 1884                               |
| New Year's Eve, New Year's Day                                   | December 31 <sup>st</sup> & January 1 <sup>st</sup>                                                                                                           | 21                                 |
| Anniversary of Pedro Vicente Maldonado <sup>a</sup>              | January 16 <sup>th</sup>                                                                                                                                      | 25                                 |
| Carnival <sup>a</sup>                                            | February 15 <sup>th</sup> —18 <sup>th</sup>                                                                                                                   | 20                                 |
| Easter <sup>a</sup>                                              | April 2 <sup>nd</sup>                                                                                                                                         | 11                                 |
| Labor Day                                                        | May 1 <sup>st</sup>                                                                                                                                           | 9                                  |
| Anniversary of the Battle of Pichincha <sup>a</sup>              | May 24 <sup>th</sup>                                                                                                                                          | 12                                 |
| Independence Day <sup>a</sup>                                    | August 10 <sup>th</sup>                                                                                                                                       | 16                                 |
| Anniversary of the Battle of Guayaquil <sup>a</sup>              | October 9 <sup>th</sup>                                                                                                                                       | 19                                 |
| All Soul's Day, Anniversary of the Battle of Cuenca <sup>a</sup> | November 2 <sup>nd</sup> —5 <sup>th</sup>                                                                                                                     | 20                                 |
| Christmas Eve, Christmas Day                                     | December 24 <sup>th</sup> & 25 <sup>th</sup>                                                                                                                  | 18                                 |
| One Day After Christmas                                          | December 26 <sup>th</sup>                                                                                                                                     | 9                                  |

195 <sup>a</sup>Date shown for 2015, official celebration date varies annually

196 <sup>b</sup>Each holiday period included the official public holiday date, and the preceding/following weekend days

197 if the date fell on a Friday or a Monday.

198

## 199 **Ethics**

200 This research was certified as non-human subjects research by the Institutional Review Board of  
201 University of Wisconsin-Madison (#2017-0033).

202

## 203 **Statistical Analysis**

204 Four observations (5% of total) for monthly absolute minimum temperature were missing. Multiple  
205 imputation was used to estimate these values using all available monthly climate variables, monthly  
206 case counts, and time. Ten imputations were performed with a fully conditional specification algorithm;  
207 parameters were pooled and used to obtain estimates.

208 Log-linked Poisson generalized linear models with generalized estimating equations (GEE)  
209 (autoregressive correlation structure) were used for all models. Models using GEE account for  
210 correlation in data, as is common in time series data. To account for temporal autocorrelation, cases  
211 were clustered by week of diagnosis. Model fit was assessed using quasi-likelihood under the  
212 independence model information criterion (QIC). Model 1 was used to evaluate the intra-annual and  
213 long-term seasonality of disease in a non-climate seasonal model; these seasonal components were  
214 included because there is evidence for intra-annual patterns in dengue diagnoses elsewhere in Ecuador  
215 [20] and our dataset had large year-to-year variations in diagnoses. Daily case counts were the outcome  
216 of interest and data from both hospitals were combined, with an indicator variable for hospital of origin.  
217 Long-term trends were estimated with a restricted cubic spline; number of knots was determined by  
218 best fit. For intra-annual effects, we compared sine and cosine waves with frequencies of once, twice,  
219 and/or three times in 365 days, using best fit to select the final fit. After selecting the best fit for the  
220 long-term and intra-annual effects, we added day-of-week and holidays as indicator variables, with the  
221 hypothesis that day-of-week may impact care-seeking decisions, and that patients may be less likely to

222 seek care on a holiday (due to family obligations or travel). Holidays included official government-  
223 declared holidays and any weekends immediately before or after these holidays, as well as the day after  
224 Christmas.

225 Because children may differ in their exposure to dengue risk factors when school is in session, the effect  
226 of school schedules were examined using a subset analysis (Model 2). We restricted this analysis to  
227 school-aged children (ages 4–18) who sought care at Hospital Pedro Vicente Maldonado (n=142). We  
228 used the best-fit long-term and intra-annual effects model from the first analysis and included an  
229 indicator variable for days where school was in session (including weekends during the school year).

230 To determine the impact of climate on disease seasonality, we built a log-linked Poisson generalized  
231 linear model (Model 3). Climate data were available as monthly averages, so daily case counts were  
232 aggregated to monthly counts. Temperature and precipitation variables were centered on their mean  
233 value; temperatures were scaled at 2° Celsius, number of days with precipitation were scaled at 5 days  
234 and total monthly precipitation was scaled at 10 mm. The effects of climate variables (all continuous or  
235 integer variables), including ONI, average monthly temperature, minimum monthly temperature,  
236 maximum monthly temperature, total monthly precipitation, and number of days per month with  
237 precipitation were evaluated. Because climate variables interact with each other in reality, we also  
238 examined interactions between the significant climate variables in the final model.

239 Data analysis and visualization was performed using SAS version 9.2 (SAS Institute, Cary, NC) including  
240 the macros DASPLINE, DSHIDE, and weekno [49, 50], and R version 3.2.2 (R Foundation for Statistical  
241 Computing, Vienna, Austria) including packages haven, raster, dismo, ggmap, OpenStreetMap, sp,  
242 geopack, and MASS [51-59].

243

## 244 **Results**

245 Characteristics of the data used in this study are in Table 2, with patient demographics available in  
246 Supplemental Table 1. No cases met the exclusion criteria; all cases were included in analysis. The  
247 diagnoses in the dataset included dengue fever (A90), dengue hemorrhagic fever (A91), other mosquito-  
248 borne viral fevers (A92), and mosquito-borne viral encephalitis (A83). Dengue diagnoses comprised  
249 98.7% of the patients in the study. On average, one case is diagnosed at Pedro Vicente Maldonado every  
250 4.3 days, and one case is diagnosed at Saludesesa every 25 days. Time series plots of aggregated monthly  
251 case data from both hospitals, and monthly climate data are in Figure 2.

252

253 **Table 2. Data Characteristics.**

| <b>Cases and Climate Factors</b> |                         | <b>Pedro Vicente<br/>Maldonado</b> | <b>Saludesesa</b> |
|----------------------------------|-------------------------|------------------------------------|-------------------|
| <b>Dengue Fever Cases</b>        | <b>n</b>                | 580                                | 34                |
|                                  | <b>Daily Minimum</b>    | 0                                  | 0                 |
|                                  | <b>Daily Mean</b>       | 0.23                               | 0.04              |
|                                  | <b>Daily Maximum</b>    | 4                                  | 3                 |
|                                  | <b>2009<sup>a</sup></b> | 38                                 | -                 |
|                                  | <b>2010</b>             | 129                                | -                 |
|                                  | <b>2011</b>             | 77                                 | -                 |
|                                  | <b>2012</b>             | 113                                | -                 |
|                                  | <b>2013</b>             | 47                                 | -                 |
|                                  | <b>2014</b>             | 103                                | 2                 |
| <b>2015</b>                      | 58                      | 32                                 |                   |

|                                                       |                         |       |   |
|-------------------------------------------------------|-------------------------|-------|---|
|                                                       | <b>2016<sup>a</sup></b> | 15    | 0 |
|                                                       | <b>January</b>          | 52    | 2 |
|                                                       | <b>February</b>         | 50    | 5 |
|                                                       | <b>March</b>            | 57    | 4 |
|                                                       | <b>April</b>            | 45    | 4 |
|                                                       | <b>May</b>              | 64    | 7 |
|                                                       | <b>June</b>             | 48    | 2 |
|                                                       | <b>July</b>             | 54    | 2 |
|                                                       | <b>August</b>           | 44    | 1 |
|                                                       | <b>September</b>        | 37    | 1 |
|                                                       | <b>October</b>          | 42    | 1 |
|                                                       | <b>November</b>         | 44    | 1 |
|                                                       | <b>December</b>         | 43    | 4 |
| <b>Oceanic Niño Index</b>                             | <b>Minimum</b>          | -1.5  |   |
|                                                       | <b>Mean</b>             | 0.30  |   |
|                                                       | <b>Maximum</b>          | 2.3   |   |
| <b>Absolute Minimum Temperature (degrees Celsius)</b> | <b>Minimum</b>          | 12.9  |   |
|                                                       | <b>Mean</b>             | 20.0  |   |
|                                                       | <b>Maximum</b>          | 22.1  |   |
| <b>Total Precipitation (millimeters)</b>              | <b>Minimum</b>          | 3.6   |   |
|                                                       | <b>Mean</b>             | 278.1 |   |
|                                                       | <b>Maximum</b>          | 989.9 |   |
| <b>Monthly Number of</b>                              | <b>Minimum</b>          | 5     |   |

|                                |                |    |     |
|--------------------------------|----------------|----|-----|
| <b>Days with Precipitation</b> | <b>Mean</b>    | 20 | 254 |
|                                | <b>Maximum</b> | 31 | 255 |

256

257

258

259

260

261

262

263

264

265

266

267

268

269

270

271

272 <sup>a</sup>These are partial years in this dataset

273

274 **Fig 2. Time Series Plots for Dataset.** Monthly averages for Oceanic Niño Index (orange), minimum (blue),  
275 mean (black), and maximum (red) temperature, precipitation (green), and diagnoses (purple) are plotted  
276 over the time period of the study.

277

278 The final model for non-climate seasonality (Model 1, parameters in Supplemental Table 2) included a  
279 sine and cosine wave with an annual cycle, long-term patterns, day-of-week effects, and indicator  
280 variables to designate holidays and hospitals. Fits metrics for the null model and each considered model  
281 are available in Supplemental Table 3. Model 1 predictions for daily diagnoses are presented in Fig 3 and  
282 exhibit an annual peak of disease in mid-March each year on average. Day-of-week effects are  
283 summarized in Fig 4. Compared to the average of all days, Tuesdays and Thursdays were more likely to  
284 have dengue fever diagnoses (Tuesday: relative risk (RR)=1.26, 95% confidence interval (CI) 1.05—1.51,  
285  $p=0.012$ , Thursday: RR=1.25, 95% CI 1.02—1.52,  $p=0.033$ ), while Saturdays and Sundays were less likely  
286 to have dengue fever diagnoses (Saturday: RR: 0.81, 95% CI 0.64—1.01,  $p=0.062$  Sunday: RR: 0.74, 95%  
287 CI 0.58—0.95,  $p=0.016$ ). Compared to non-holidays, dengue fever cases were much more likely to be  
288 diagnosed the day after Christmas (RR: 2.80, 95% CI 1.46—5.30,  $p=0.002$ ), after holding all other  
289 covariates constant. The subanalysis (Model 2) did not find an effect of school session on dengue  
290 diagnoses.

291

292 **Fig 3. Non-climate Seasonality.** The non-climate seasonality (Model 1) predictions for daily diagnoses  
293 exhibit an annual seasonality peaking in mid-March. Case predictions are in black, with confidence  
294 intervals in grey. The top panel depicts predictions for Hospital Pedro Vicente Maldonado and the  
295 bottom panel depicts predictions for Hospital Saludesá.

296

297 **Fig 4. Day-of-Week Effects.** The effect of the day of the week on dengue fever diagnoses is summarized  
298 in this graph, comparing each day to the overall average effect of weekday. A null estimate (RR=1.0) is  
299 included as a reference. Effect estimates are derived from Model 1. CI=confidence interval.

300

301 Most climate variables exhibited small but significant effects on risk of dengue fever diagnoses. Fit  
302 metrics for the null model and each considered climate model are available in Supplemental Table 4.  
303 Greater total monthly precipitation (RR: 2.14, 95% CI 1.26—3.64, p=0.005) results in increases in dengue  
304 fever diagnoses, *i.e.* for every 10mm increase in monthly precipitation, there is an approximately two-  
305 fold increase in dengue fever diagnoses on average. In addition, there were significant interactions  
306 between total monthly precipitation, number of days with precipitation, and monthly absolute  
307 minimum temperature. Model 3 predictions of interaction variable effects are in Fig 5, wherein  
308 observed values for monthly absolute minimum temperature, total monthly precipitation, and days per  
309 month with precipitation were used to predict the number of dengue cases per month within a  
310 reasonable range of precipitation and minimum temperature values. At an absolute minimum  
311 temperature of 18—19° C, the predicted number of cases increased (5 to 15 cases per month) as total  
312 monthly precipitation increased (from 125 to 875 mm per month) and *decreased* as the number of days  
313 with precipitation increased (from 5 to 30 days per month), but as minimum temperatures warm, the  
314 direction of these relationships changes. When the absolute minimum temperature is 20° C, additional  
315 days with precipitation or increases in monthly amounts of precipitation have little effect on the number  
316 of diagnoses. For a monthly minimum temperature of 21—22° C, the effect of increased amounts of  
317 precipitation is weaker, but still positive, while the impact of number of days with precipitation at  
318 warmer temperatures leads to *increases* in the number of dengue diagnoses (from 2 to 10 cases per  
319 month).

320



321 **Fig 5. Interactions Between Monthly Precipitation and Monthly Minimum Temperature** Within  
322 individual plot panels, number of days with precipitation increase along the x-axis while monthly  
323 predicted number of dengue cases increase along the y-axis. Absolute minimum temperature levels  
324 increase along panel columns from left to right, and monthly amounts of precipitation increase along  
325 panel rows from bottom to top. Increases in the amount of precipitation leads to increases in the  
326 number of dengue diagnoses for all temperature conditions, but the relationship between temperature  
327 and number of days with precipitation exhibits an overall U-shaped pattern. As the minimum  
328 temperature warms, the relationship between number of days with precipitation and number of dengue  
329 diagnoses changes from negative to positive. At lower temperatures (18–19° C), additional days with  
330 precipitation lead to decreases in the predicted number of dengue cases. At 20° C, the relationship is  
331 flat, and at warmer temperatures (21–22° C), additional days with precipitation lead to increases in the  
332 number of dengue cases. Effect estimates were obtained from Model 3. T=monthly minimum  
333 temperature, mm=millimeters, C=Celsius.

334

## 335 **Discussion**

336 Understanding the seasonality of infectious diseases can be crucial to the public health efforts to control  
337 these diseases. Seasonality is a major determinant of vaccination scheduling, timing of educational  
338 campaigns, and allocation of resources. In this paper, we examine non-climate (long-term trends, intra-  
339 annual patterns, day-of-week and holiday effects) and climate components of seasonality.

340 Our data exhibits annual peaks in dengue fever diagnoses, occurring in mid- March. Long-term studies of  
341 dengue seasonality in coastal Ecuador and other countries also exhibit annual peaks as well as inter-  
342 epidemic periods (high-intensity dengue fever seasons followed by a low-intensity season or seasons the  
343 following two years). Coastal Ecuador exhibits significant annual and two-year peaks in dengue  
344 incidence [20]; additional studies indicate that El Niño events, which occur in variable annual or multi-

345 year patterns, may also influence dengue incidence patterns [19]. Our data exhibits peaks in 2012, and  
346 2015; 2009 and 2015 were moderate and very strong were El Niño years, respectively [60]. Research  
347 from Peru suggests annual and three-year peaks in dengue incidence [61], while Colombia experiences  
348 two- to five-year cycles [62], with some parts of Colombia lacking annual disease peaks [63].

349 In this dataset, dengue fever diagnoses were likely affected by healthcare-seeking behavior. The  
350 decision and timing of seeking care for health problems can be affected by short-term time trends  
351 including day-of-week and holiday patterns. This type of research is scarce in South America. In the US  
352 and the UK, research on day-of-week effects has found that patients are less likely to visit the hospital  
353 on a weekend and that weekend hospital visits tend to be non-elective [64, 65], suggesting that patients  
354 may put off healthcare for less serious health conditions. Our findings agree with previous research,  
355 with Saturdays and Sundays being the least likely days for dengue fever diagnosis. However, we  
356 additionally found an increase in diagnoses on Tuesdays and Thursdays. We speculate that there may be  
357 some underlying pattern to diagnostic capabilities (e.g. staffing patterns, shipment days for lab supplies,  
358 or a backlog of patient samples from the weekend). We also examined holidays, with the reasoning that  
359 patients would also delay healthcare until after holidays. Previous studies suggest that holiday effects  
360 may be complex: research from Colombia has shown increases in dengue during periods immediately  
361 following holidays, from patients travelling to dengue-endemic areas during the holidays [66]. In our  
362 study, the individual holidays largely had no effect on dengue diagnoses, except for the day after  
363 Christmas ( $p=0.0015$ ), when patients were more likely to be diagnosed with dengue fever. Since the  
364 incubation period for dengue is 4–10 days, and since most patients are local, we feel this spike in  
365 diagnoses is from those who became ill over the holiday and delayed their care, rather than acquired  
366 their illness during holiday travel. However, other than decreased diagnoses on Saturdays, day-to-day  
367 patterns of infectious disease healthcare-seeking at these hospitals did not have the same fluctuations

368 as the dengue patients (data not shown), meaning these patterns may be the result of statistical noise  
369 and not general health-care seeking behaviors in the community.

370 In our seasonality assessment, we found that dengue fever diagnoses peaks during mid-March on  
371 average. This is the first assessment of dengue fever seasonality in rural Ecuador. Reports from nearby  
372 Colombia regarding dengue fever seasonality have not found an annual seasonal pattern for dengue  
373 incidence [63, 67], though these studies did not utilize sinusoidal variables, making it difficult to detect  
374 these patterns.

375 Climatic factors such as temperature or precipitation can affect the survival and distribution of mosquito  
376 vectors and the transmissibility of pathogens from these vectors [16-18]. In previous research in  
377 Colombia, studies have found average temperature, changes in average temperature, average relative  
378 humidity, total precipitation, and El Niño events to be major predictors of dengue incidence [63, 68].  
379 Research in Ecuador has been limited to studies of dengue cases in coastal regions. In one study,  
380 minimum weekly temperature and weekly average precipitation were shown to be strongly linked to  
381 weekly number of dengue cases [20]. Minimum weekly temperature, precipitation, and El Niño events  
382 were also positively associated with dengue risk [19]. Our data illustrate a complex relationship between  
383 climate factors and dengue fever diagnoses. Temperature is a major factor; dengue transmission is  
384 sensitive to extremes of temperature as *Aedes aegypti* propagate and transmit dengue best between  
385 18—32° C [63], but precipitation is also important. In isolation, total monthly precipitation and number  
386 of days with precipitation had opposite effects, suggesting that sufficient precipitation is necessary for  
387 dengue cases to occur, but that too many days with precipitation decrease risk. However, when we  
388 consider minimum monthly temperature, temperature modifies the effects of precipitation in a U-  
389 shaped pattern. All amounts of precipitation drive increases in dengue diagnoses but additional days  
390 with precipitation lead to decreases in dengue diagnoses while when temperatures are lowest, as in the  
391 months of July through November (mean minimum temperatures of 19.0—19.7° C). During these

392 months precipitation amounts are all below 250 mm on average and durations are 11.7 to 15.7 days on  
393 average, resulting in a relatively low predicted number of dengue fever cases. At warmer temperatures,  
394 both number of days with and amount of precipitation have positive relationships with the number of  
395 dengue diagnoses. At the warmer part of the year – *i.e.* December through June (mean minimum  
396 temperatures of 19.8–21.2° C), precipitation quantity is higher (mean 271.6–635.4 mm per month)  
397 and occurs on more days (mean 21.6–28.3 days per month).

398 Our results likely reflect the effect of precipitation on mosquitoes: female *Aedes aegypti* mosquitoes  
399 tend to lay eggs just above the water surface in containers [69] until additional precipitation (*i.e.*  
400 flooding of the eggs) causes the eggs to hatch, but too much precipitation can wash eggs or larvae out of  
401 their containers [70], meaning some dry periods are necessary or even beneficial to *Aedes aegypti*  
402 abundance. Previous research has found that *Aedes aegypti* breeding site occupancy is increased at sites  
403 with longer dry periods [71]. Temperature levels affect evaporation rates and the durability of standing  
404 water (*i.e.* breeding and development sites); this may explain temperature’s modifying impact on the  
405 relationship between precipitation and dengue diagnoses.

406 Human hosts may also change their travel outside the home during consistently rainy periods, which  
407 may alter their exposure to dengue-infected mosquitoes (depending on where they are most exposed).  
408 Research in Australia found that virus acquisition was spatiotemporally linked to the case’s residence in  
409 42% of dengue cases [72], though this proportion may differ in other geographic locations. Human  
410 movement and behavior is a major component of dengue fever risk [73]. Weather patterns affect  
411 human movements, with high movement variation on days with higher precipitation [74]. The patterns  
412 between dengue fever risk and climate variables observed in our data are likely a combination of the  
413 effect of climate on mosquito vectors and human behaviors.

414 Notably, the best-fit climate seasonality model included both long-term and annual sinusoidal variables,  
415 in addition to climate variables. If dengue seasonality were entirely driven by climate, we would expect

416 that a model adjusting for the effects of climate to be sufficient with no long-term nor annual sinusoidal  
417 variables (*i.e.* all variation in the diagnosis rate would be explained by the climate variables). The  
418 importance of the long-term and annual sinusoidal variables in our climate model suggests that we are  
419 not completely adjusting for the effect of climate or that non-climate phenomena impact the seasonality  
420 of dengue diagnoses. Our ability to disentangle climate and non-climate seasonality is complicated by  
421 the introduction of chikungunya into a naïve population in 2015. These cases were treated as dengue  
422 diagnoses in our models, but it is impossible to know how many during this period were true dengue  
423 cases. Because chikungunya and dengue are spread by the same mosquito species, *Aedes aegypti*, we  
424 expect that many of the effects of climate will be the same for both chikungunya and dengue. The  
425 effects of chikungunya emergence on overall seasonality are important to consider. This introduction  
426 occurred outside of the typical dengue season (November) and had a high number of cases, meaning  
427 that the average annual peak of dengue is slightly earlier in our model than the true average annual  
428 peak of dengue in this population.

## 429 **Limitations**

430 This dataset combines the patients from two hospitals. The patients at each hospital differ in their  
431 gender composition and insurance status. Both gender and insurance status likely affect healthcare-  
432 seeking behavior, meaning that the hospital populations may have different non-climate seasonal  
433 patterns of dengue diagnoses and some uncontrolled confounding may affect our results. However, we  
434 do control for the source hospital in our analysis which would control for some of these differences, and  
435 since the majority of cases (94.5%) are from one hospital, we do not expect this issue to substantially  
436 affect our results.

437 This dataset represents dengue fever diagnoses in the community and is only a proxy for dengue fever  
438 incidence rates. There are likely to be many more cases dengue fever in the community: 80% of dengue  
439 cases are estimated to be asymptomatic, some symptomatic patients may never seek care, and some

440 symptomatic patients may have sought care at hospitals other than those included in this study. This  
441 could be a potential source of selection bias. However, our study hospitals are the major source of care  
442 in their communities and we are assessing seasonality and climate variables; we have no reason to  
443 believe that the effect of seasonality and climate is any different among symptomatic versus  
444 asymptomatic patients nor for the small number of persons who sought care at other clinics. The effect  
445 of selection bias on these data is likely minimal.

446 Dengue diagnosis can be difficult even for experienced clinicians, especially in a resource-limited setting  
447 such as Ecuador. Not all patients with a final dengue diagnosis were necessarily lab-confirmed; the use a  
448 laboratory confirmation likely varies by clinician, patient, and presenting symptoms, though the  
449 clinicians at the study hospitals are all experienced with dengue diagnosis. Based on observed hospital  
450 practices, we believe many of the cases in our dataset had positive dengue rapid tests, but that some  
451 were clinically diagnosed. Because not all cases were laboratory-confirmed, it is possible that some non-  
452 dengue cases were diagnosed as dengue, particularly when chikungunya was introduced to Ecuador  
453 (late 2015) and no diagnostic tools were available for chikungunya.

454 Our dataset only covers a seven-year period making it difficult to conclude if our observations truly  
455 reflect long-term or multi-year disease trends in this community. Additional research for longer periods  
456 of time will reveal if three-year peaks or changes in dengue fever diagnose rates are present in this  
457 community. The diagnosis of dengue could have been impacted by additional phenomena over the  
458 study period. Changes in mosquito control practices could affect actual disease rates or worsening  
459 economic conditions in Ecuador (due to a decrease in oil prices) would adversely affect the ability of  
460 patients to seek healthcare. In addition, a major earthquake in April 2016 disrupted many services in  
461 Ecuador, including transportation, utilities, and healthcare for several weeks, which may have disrupted  
462 the typical healthcare-seeking behavior of patients and the diagnostic capabilities of the hospitals during  
463 this time.

464 Available climate data was captured from a climatological station located 39 and 36 kilometers from  
465 Hospital Pedro Vicente and Hospital Saludes, respectively. These data are only a proxy for actual  
466 climate conditions in our communities of interest. In addition, analyses with climate variables were  
467 limited to monthly summaries of these variables, making it difficult to ascertain if the relationships  
468 discovered in this research reflect the true relationship between climate variables and dengue fever  
469 diagnoses in these populations. Under the assumption that most patients would be bitten, experience  
470 symptoms, and seek care within the same month, the climate-diagnosis relationships presented in this  
471 study are a good estimate of dengue seasonality in these communities. In reality, there is considerable  
472 variation among the climate variables, mosquito exposure and dengue diagnoses in this community,  
473 which we were unable to capture in this study. Nor are we able to estimate the effects of climate  
474 variable interactions among ranges and combinations of variables that were unobserved in this location.  
475 In addition, the effect estimates for the climate variable interactions were often based on a small  
476 sample size, leading to wide confidence intervals for these estimates. Indeed, the veracity of this  
477 interaction will need to be confirmed with additional research. Future research will also address the  
478 limited range and unobserved climate combinations in this dataset by testing this interaction with data  
479 from areas with different climate conditions.

480

## 481 **Acknowledgements**

482 Thank you to the information technology staff at Hospital Pedro Vicente Maldonado and Dr. Daniel  
483 Larco for explanation of diagnostic methods at the sites.

484

## 485 **References**

486

487 1. Bloom-Feshbach K, Alonso WJ, Charu V, Tamerius J, Simonsen L, Miller MA, et al. Latitudinal  
488 variations in seasonal activity of influenza and respiratory syncytial virus (RSV): a global comparative

- 489 review. *PLoS One*. 2013;8(2):e54445. doi: 10.1371/journal.pone.0054445. PubMed PMID: 23457451;  
490 PubMed Central PMCID: PMCPMC3573019.
- 491 2. Oliveira CR, Costa GS, Paploski IA, Kikuti M, Kasper AM, Silva MM, et al. Influenza-like illness in  
492 an urban community of Salvador, Brazil: incidence, seasonality and risk factors. *BMC Infect Dis*.  
493 2016;16:125. doi: 10.1186/s12879-016-1456-8. PubMed PMID: 26975185; PubMed Central PMCID:  
494 PMCPMC4791800.
- 495 3. Saha S, Chadha M, Al Mamun A, Rahman M, Sturm-Ramirez K, Chittaganpitch M, et al. Influenza  
496 seasonality and vaccination timing in tropical and subtropical areas of southern and south-eastern Asia.  
497 *Bull World Health Organ*. 2014;92(5):318-30. doi: 10.2471/BLT.13.124412. PubMed PMID: 24839321;  
498 PubMed Central PMCID: PMCPMC4007122.
- 499 4. Tamerius J, Nelson MI, Zhou SZ, Viboud C, Miller MA, Alonso WJ. Global influenza seasonality:  
500 reconciling patterns across temperate and tropical regions. *Environ Health Perspect*. 2011;119(4):439-  
501 45. doi: 10.1289/ehp.1002383. PubMed PMID: 21097384; PubMed Central PMCID: PMCPMC3080923.
- 502 5. Tang JW, Ngai KL, Lam WY, Chan PK. Seasonality of influenza A(H3N2) virus: a Hong Kong  
503 perspective (1997-2006). *PLoS One*. 2008;3(7):e2768. doi: 10.1371/journal.pone.0002768. PubMed  
504 PMID: 18648550; PubMed Central PMCID: PMCPMC2481298.
- 505 6. Thai PQ, Choisy M, Duong TN, Thiem VD, Yen NT, Hien NT, et al. Seasonality of absolute  
506 humidity explains seasonality of influenza-like illness in Vietnam. *Epidemics*. 2015;13:65-73. doi:  
507 10.1016/j.epidem.2015.06.002. PubMed PMID: 26616043.
- 508 7. Reiner RC, Jr., Geary M, Atkinson PM, Smith DL, Gething PW. Seasonality of *Plasmodium*  
509 *falciparum* transmission: a systematic review. *Malar J*. 2015;14:343. doi: 10.1186/s12936-015-0849-2.  
510 PubMed PMID: 26370142; PubMed Central PMCID: PMCPMC4570512.
- 511 8. Stewart Ibarra AM, Ryan SJ, Beltran E, Mejia R, Silva M, Munoz A. Dengue vector dynamics  
512 (*Aedes aegypti*) influenced by climate and social factors in Ecuador: implications for targeted control.  
513 *PLoS One*. 2013;8(11):e78263. doi: 10.1371/journal.pone.0078263. PubMed PMID: 24324542; PubMed  
514 Central PMCID: PMCPMC3855798.
- 515 9. You S, Tong YW, Neoh KG, Dai Y, Wang CH. On the association between outdoor PM2.5  
516 concentration and the seasonality of tuberculosis for Beijing and Hong Kong. *Environ Pollut*. 2016. doi:  
517 10.1016/j.envpol.2016.08.071. PubMed PMID: 27595179.
- 518 10. Wingfield T, Schumacher SG, Sandhu G, Tovar MA, Zevallos K, Baldwin MR, et al. The seasonality  
519 of tuberculosis, sunlight, vitamin D, and household crowding. *J Infect Dis*. 2014;210(5):774-83. doi:  
520 10.1093/infdis/jiu121. PubMed PMID: 24596279; PubMed Central PMCID: PMCPMC4130318.
- 521 11. Hogan AB, Anderssen RS, Davis S, Moore HC, Lim FJ, Fathima P, et al. Time series analysis of RSV  
522 and bronchiolitis seasonality in temperate and tropical Western Australia. *Epidemics*. 2016;16:49-55.  
523 doi: 10.1016/j.epidem.2016.05.001. PubMed PMID: 27294794.
- 524 12. Chakraborty A, Komatsu K, Roberts M, Collins J, Beggs J, Turabelidze G, et al. The descriptive  
525 epidemiology of yersiniosis: a multistate study, 2005-2011. *Public Health Rep*. 2015;130(3):269-77.  
526 PubMed PMID: 25931631; PubMed Central PMCID: PMCPMC4388225.
- 527 13. Ravel A, Smolina E, Sargeant JM, Cook A, Marshall B, Fleury MD, et al. Seasonality in human  
528 salmonellosis: assessment of human activities and chicken contamination as driving factors. *Foodborne*  
529 *Pathog Dis*. 2010;7(7):785-94. doi: 10.1089/fpd.2009.0460. PubMed PMID: 20184452.
- 530 14. Wilson E. Foodborne illness and seasonality related to mobile food sources at festivals and  
531 group gatherings in the state of Georgia. *J Environ Health*. 2015;77(7):8-11; quiz 54. PubMed PMID:  
532 25796696.
- 533 15. Lal A, Hales S, French N, Baker MG. Seasonality in human zoonotic enteric diseases: a systematic  
534 review. *PLoS One*. 2012;7(4):e31883. doi: 10.1371/journal.pone.0031883. PubMed PMID: 22485127;  
535 PubMed Central PMCID: PMCPMC3317665.



- 536 16. Zouache K, Fontaine A, Vega-Rua A, Mousson L, Thiberge JM, Lourenco-De-Oliveira R, et al.  
537 Three-way interactions between mosquito population, viral strain and temperature underlying  
538 chikungunya virus transmission potential. *Proc Biol Sci*. 2014;281(1792). doi: 10.1098/rspb.2014.1078.  
539 PubMed PMID: 25122228; PubMed Central PMCID: PMC4150320.
- 540 17. Dhimal M, Gautam I, Joshi HD, O'Hara RB, Ahrens B, Kuch U. Risk factors for the presence of  
541 chikungunya and dengue vectors (*Aedes aegypti* and *Aedes albopictus*), their altitudinal distribution and  
542 climatic determinants of their abundance in central Nepal. *PLoS Negl Trop Dis*. 2015;9(3):e0003545. doi:  
543 10.1371/journal.pntd.0003545. PubMed PMID: 25774518; PubMed Central PMCID: PMC4361564.
- 544 18. Goindin D, Delannay C, Ramdini C, Gustave J, Fouque F. Parity and longevity of *Aedes aegypti*  
545 according to temperatures in controlled conditions and consequences on dengue transmission risks.  
546 *PLoS One*. 2015;10(8):e0135489. doi: 10.1371/journal.pone.0135489. PubMed PMID: 26258684;  
547 PubMed Central PMCID: PMC4530937.
- 548 19. Stewart-Ibarra AM, Lowe R. Climate and non-climate drivers of dengue epidemics in southern  
549 coastal Ecuador. *Am J Trop Med Hyg*. 2013;88(5):971-81. doi: 10.4269/ajtmh.12-0478. PubMed PMID:  
550 23478584; PubMed Central PMCID: PMC3752767.
- 551 20. Stewart-Ibarra AM, Munoz AG, Ryan SJ, Ayala EB, Borbor-Cordova MJ, Finkelstein JL, et al.  
552 Spatiotemporal clustering, climate periodicity, and social-ecological risk factors for dengue during an  
553 outbreak in Machala, Ecuador, in 2010. *BMC Infect Dis*. 2014;14:610. doi: 10.1186/s12879-014-0610-4.  
554 PubMed PMID: 25420543; PubMed Central PMCID: PMC4264610.
- 555 21. Waldock J, Chandra NL, Lelieveld J, Proestos Y, Michael E, Christophides G, et al. The role of  
556 environmental variables on *Aedes albopictus* biology and chikungunya epidemiology. *Pathog Glob*  
557 *Health*. 2013;107(5):224-41. doi: 10.1179/2047773213Y.0000000100. PubMed PMID: 23916332;  
558 PubMed Central PMCID: PMC4001452.
- 559 22. Forshey BM, Guevara C, Laguna-Torres VA, Cespedes M, Vargas J, Gianella A, et al. Arboviral  
560 etiologies of acute febrile illnesses in Western South America, 2000-2007. *PLoS Negl Trop Dis*.  
561 2010;4(8):e787. doi: 10.1371/journal.pntd.0000787. PubMed PMID: 20706628; PubMed Central PMCID:  
562 PMC2919378.
- 563 23. Ten Bosch QA, Clapham HE, Lambrechts L, Duong V, Buchy P, Althouse BM, et al. Contributions  
564 from the silent majority dominate dengue virus transmission. *PLoS Pathog*. 2018;14(5):e1006965. doi:  
565 10.1371/journal.ppat.1006965. PubMed PMID: 29723307; PubMed Central PMCID: PMC5933708.
- 566 24. Patterson J, Sammon M, Garg M. Dengue, Zika and Chikungunya: Emerging Arboviruses in the  
567 New World. *West J Emerg Med*. 2016;17(6):671-9. doi: 10.5811/westjem.2016.9.30904. PubMed PMID:  
568 27833670; PubMed Central PMCID: PMC5102589.
- 569 25. Cavailer P, Tarantola A, Leo YS, Lover AA, Rachline A, Duch M, et al. Early diagnosis of dengue  
570 disease severity in a resource-limited Asian country. *BMC Infect Dis*. 2016;16(1):512. doi:  
571 10.1186/s12879-016-1849-8. PubMed PMID: 27670906; PubMed Central PMCID: PMC5036306.
- 572 26. Paynter S, Ware RS, Sly PD, Williams G, Weinstein P. Seasonal immune modulation in humans:  
573 observed patterns and potential environmental drivers. *J Infect*. 2015;70(1):1-10. doi:  
574 10.1016/j.jinf.2014.09.006. PubMed PMID: 25246360.
- 575 27. Dopico XC, Evangelou M, Ferreira RC, Guo H, Pekalski ML, Smyth DJ, et al. Widespread seasonal  
576 gene expression reveals annual differences in human immunity and physiology. *Nat Commun*.  
577 2015;6:7000. doi: 10.1038/ncomms8000. PubMed PMID: 25965853; PubMed Central PMCID:  
578 PMC4432600.
- 579 28. Liu B, Taioli E. Seasonal Variations of Complete Blood Count and Inflammatory Biomarkers in the  
580 US Population - Analysis of NHANES Data. *PLoS One*. 2015;10(11):e0142382. doi:  
581 10.1371/journal.pone.0142382. PubMed PMID: 26544180; PubMed Central PMCID: PMC4636256.
- 582 29. Mordecai EA, Cohen JM, Evans MV, Gudapati P, Johnson LR, Lippi CA, et al. Detecting the impact  
583 of temperature on transmission of Zika, dengue, and chikungunya using mechanistic models. *PLoS Negl*

- 584 Trop Dis. 2017;11(4):e0005568. doi: 10.1371/journal.pntd.0005568. PubMed PMID: 28448507; PubMed  
585 Central PMCID: PMC5423694.
- 586 30. Pant CP, Yasuno M. Field studies on the gonotrophic cycle of *Aedes aegypti* in Bangkok,  
587 Thailand. J Med Entomol. 1973;10:219-23.
- 588 31. Rueda LM, Patel KJ, Axtell RC, Stinner RE. Temperature-dependent development and survival  
589 rates of *Culex quinquefasciatus* and *Aedes aegypti* (Diptera: Culicidae). J Med Entomol. 1990;27:892-8.
- 590 32. Tun-Lin W, Burkot TR, Kay BH. Effects of temperature and larval diet on development rates and  
591 survival of the dengue vector *Aedes aegypti* in north Queensland, Australia. Med Vet Entomol.  
592 2000;14:31-7.
- 593 33. Yasuno M, Tonn RJ. A study of biting habits of *Aedes aegypti* in Bangkok, Thailand. Bull World  
594 Health Organ. 1970;43:319-25.
- 595 34. Bar-Zeev M. The effect of temperature on the growth rate and survival of the immature stages  
596 of *Aedes aegypti* (L.). Bull Entomol Res. 1958;49:157-63.
- 597 35. Eisen L, Monaghan AJ, Lozano-Fuentes S, Steinhoff DF, Hayden MH, Bieringer PE. The impact of  
598 temperature on the bionomics of *Aedes (Stegomyia) aegypti*, with special reference to the cool  
599 geographic range margins. J Med Entomol. 2014;51:496-516.
- 600 36. Focks DA, Haile DG, Daniels E, Mount GA. Dynamic life table model for *Aedes aegypti* (Diptera:  
601 Culicidae): analysis of the literature and model development. J Med Entomol. 1993;30:1003-17.
- 602 37. Nagao Y, Thavara U, Chitnumsup P, Tawatsin A, Chansang C, Campbell-Lendrum D. Climatic and  
603 social risk factors for *Aedes* infestation in rural Thailand. Trop Med Int Health. 2003;8(7):650-9.
- 604 38. Prado GP, Maciel JP, Leite GR, Souza MAA. Influence of shading and pedestrian traffic on the  
605 preference of *Aedes (Stegomyia) aegypti* (Diptera: Culicidae) for oviposition microenvironments. J  
606 Vector Ecol. 2017;42(1):155-60.
- 607 39. Resende MC, Silva IM, Ellis BR, Eiras AE. A comparison of larval, ovitrap and MosquiTRAP  
608 surveillance for *Aedes (Stegomyia) aegypti*. Mem Inst Oswaldo Cruz. 2013;108(8):1024-30. doi:  
609 10.1590/0074-0276130128. PubMed PMID: 24402144; PubMed Central PMCID: PMC4005541.
- 610 40. Simoes TC, Codeco CT, Nobre AA, Eiras AE. Modeling the non-stationary climate dependent  
611 temporal dynamics of *Aedes aegypti*. PLoS One. 2013;8(8):e64773. doi: 10.1371/journal.pone.0064773.  
612 PubMed PMID: 23976939; PubMed Central PMCID: PMC3748059.
- 613 41. Merkel A. Climate: Ecuador: Climate-Data.org; 2012 [cited 2016 June 1, 2016]. Available from:  
614 <https://en.climate-data.org/south-america/ecuador-63/>.
- 615 42. Lyon B, Barnston AG. ENSO and the Spatial Extent of Interannual Precipitation Extremes in  
616 Tropical Land Areas. Journal of Climate 2005;18:5095-109.
- 617 43. Ministerio de Turismo. Calendario de Feriados 2012 [cited 2016 10 December]. Available from:  
618 <http://www.turismo.gob.ec/calendario-de-feriados/>.
- 619 44. Calendario de feriados del 2010. El Universo. 22 December 2009.
- 620 45. Presidente Correa dispone los feriados hasta el año 2011. Ecuador Inmediato. 16 June 2007.
- 621 46. Diez días serán feriados en el 2009. La Hora. 30 December 2008.
- 622 47. Boletines meteorológicos históricos [Internet]. Gobierno Nacional de la Republica del Ecuador.  
623 [cited 10 December 2016]. Available from:  
624 <http://www.serviciometeorologico.gob.ec/meteorologia/bolhist/cli/>.
- 625 48. Instituto Nacional de Meteorología e Hidrología. Anuarios Meteorológico. In: Hidrología INdMe,  
626 editor. Quito, Ecuador: Gobierno Nacional de la Republica del Ecuador.
- 627 49. Harrell FE. DASPLINE Macro. Available from:  
628 <http://biostat.mc.vanderbilt.edu/twiki/pub/Main/SasMacros/survrisk.txt>.
- 629 50. Whitlock I, Rohrbough R. weekno Macro. Available from:  
630 <https://groups.google.com/forum/#!topic/comp.soft-sys.sas/OCMjn9KYcc8>.

- 631 51. R Core Team. R: A Language and Environment for Statistical Computing. In: Computing RFFS,  
632 editor. 3.2.2 ed. Vienna, Austria 2013.
- 633 52. Hijmans RJ, Phillips S, Leathwick J, Elith J. dismo: Species Distribution Modeling. 1.1-4 ed 2017.
- 634 53. Hijmans RJ, van Etten J, Cheng J, Mattiuzzi M, Sumner M, Greenberg JP, et al. raster: Geographic  
635 Data Analysis and Modeling. 2.5-8 ed 2016.
- 636 54. Kahle D, Wickham H. ggmap: Spatial Visualization with ggplot2. 2.6.1 ed 2016.
- 637 55. Pebesma E, Bivand R, Rowlingson B, Gomez-Rubio V, Hijmans RJ, Sumner M, et al. sp: Classes  
638 and Methods for Spatial Data. 1.2-4 ed 2016.
- 639 56. Wickham H, Miller E. haven: Import and Export 'SPSS', 'Stata' and 'SAS' Files. R package version  
640 1.1.0 ed 2017.
- 641 57. Fellows I. OpenStreetMap: Access to Open Street Map Raster Images. 0.3.3 ed 2016.
- 642 58. Hajsgaard S, Halekoh U, Yan J. The R Package geepack for Generalized Estimating Equations  
643 Journal of Statistical Software. 2006;15(2):1-11.
- 644 59. Venables WN, Ripley BD. Modern Applied Statistics with S. 4th Edition ed. New York: Springer;  
645 2002.
- 646 60. Null J. El Niño and La Niña Years and Intensities: Golden Gate Weather Services; 2018 [15 Feb  
647 2016]. Available from: <http://ggweather.com/enso/oni.htm>.
- 648 61. Stoddard ST, Wearing HJ, Reiner RC, Jr., Morrison AC, Astete H, Vilcarrromero S, et al. Long-Term  
649 and Seasonal Dynamics of Dengue in Iquitos, Peru. PLoS Negl Trop Dis. 2014;8(7):e3003. doi:  
650 10.1371/journal.pntd.0003003.
- 651 62. Fernandez-Nino JA, Cardenas-Cardenas LM, Hernandez-Avila JE, Palacio-Mejia LS, Castaneda-  
652 Orjuela CA. Exploratory wavelet analysis of dengue seasonal patterns in Colombia. Biomedica.  
653 2015;36(0):44-55. doi: 10.7705/biomedica.v36i0.2869. PubMed PMID: 27622792.
- 654 63. Eastin MD, Delmelle E, Casas I, Wexler J, Self C. Intra- and interseasonal autoregressive  
655 prediction of dengue outbreaks using local weather and regional climate for a tropical environment in  
656 Colombia. Am J Trop Med Hyg. 2014;91(3):598-610. doi: 10.4269/ajtmh.13-0303. PubMed PMID:  
657 24957546; PubMed Central PMCID: PMC4155567.
- 658 64. Ryan K, Levit K, Davis PH. Characteristics of Weekday and Weekend Hospital Admissions:  
659 Statistical Brief #87. Healthcare Cost and Utilization Project (HCUP) Statistical Briefs. Rockville  
660 (MD) 2006.
- 661 65. Meacock R, Anselmi L, Kristensen SR, Doran T, Sutton M. Higher mortality rates amongst  
662 emergency patients admitted to hospital at weekends reflect a lower probability of admission. J Health  
663 Serv Res Policy. 2016. doi: 10.1177/1355819616649630. PubMed PMID: 27255144.
- 664 66. Chaparro PE, de la Hoz F, Lozano Becerra JC, Repetto SA, Alba Soto CD. Internal travel and risk of  
665 dengue transmission in Colombia. Rev Panam Salud Publica. 2014;36(3):197-200. PubMed PMID:  
666 25418771.
- 667 67. Restrepo BN, Beatty ME, Goetz Y, Ramirez RE, Letson GW, Diaz FJ, et al. Frequency and clinical  
668 manifestations of dengue in urban medellin, Colombia. J Trop Med. 2014;2014:872608. doi:  
669 10.1155/2014/872608. PubMed PMID: 24987421; PubMed Central PMCID: PMC4060062.
- 670 68. Restrepo AC, Baker P, Clements AC. National spatial and temporal patterns of notified dengue  
671 cases, Colombia 2007-2010. Trop Med Int Health. 2014;19(7):863-71. doi: 10.1111/tmi.12325. PubMed  
672 PMID: 24862214.
- 673 69. Madeira NG, Macharelli CA, Carvalho LR. Variation of the oviposition preferences of Aedes  
674 aegypti in function of substratum and humidity. Mem Inst Oswaldo Cruz. 2002;97(3):415-20. PubMed  
675 PMID: 12048575.
- 676 70. Koenraadt CJ, Harrington LC. Flushing effect of rain on container-inhabiting mosquitoes Aedes  
677 aegypti and Culex pipiens (Diptera: Culicidae). J Med Entomol. 2008;45(1):28-35. PubMed PMID:  
678 18283939.

- 679 71. Juliano SA, O'Meara GF, Morrill JR, Cutwa MM. Desiccation and thermal tolerance of eggs and  
680 the coexistence of competing mosquitoes. *Oecologia*. 2002;130(3):458-69. doi:  
681 10.1007/s004420100811. PubMed PMID: 20871747; PubMed Central PMCID: PMCPMC2944657.
- 682 72. Vazquez-Prokopec GM, Montgomery BL, Horne P, Clennon JA, Ritchie SA. Combining contact  
683 tracing with targeted indoor residual spraying significantly reduces dengue transmission. *Sci Adv*.  
684 2017;3(2):e1602024. doi: 10.1126/sciadv.1602024. PubMed PMID: 28232955; PubMed Central PMCID:  
685 PMCPMC5315446.
- 686 73. Stoddard ST, Morrison AC, Vazquez-Prokopec GM, Paz Soldan V, Kochel TJ, Kitron U, et al. The  
687 role of human movement in the transmission of vector-borne pathogens. *PLoS Negl Trop Dis*.  
688 2009;3(7):e481. doi: 10.1371/journal.pntd.0000481. PubMed PMID: 19621090; PubMed Central PMCID:  
689 PMCPMC2710008.
- 690 74. Horanont T, Phithakkitnukoon S, Leong TW, Sekimoto Y, Shibasaki R. Weather effects on the  
691 patterns of people's everyday activities: a study using GPS traces of mobile phone users. *PLoS One*.  
692 2013;8(12):e81153. doi: 10.1371/journal.pone.0081153. PubMed PMID: 24367481; PubMed Central  
693 PMCID: PMCPMC3867318.

694

695 **Supplemental Figure: Splines and Sine/Cosine Effects in Model 1**

696 The dashed line is the combined effect of the sine and cosine effects in the model, representing the  
697 annual fluctuation of dengue. The dotted line is the effect of the 7-knot spline, representing the long-  
698 term or inter-annual fluctuation of dengue. The solid line is the combination of these two effects in  
699 Model 1.

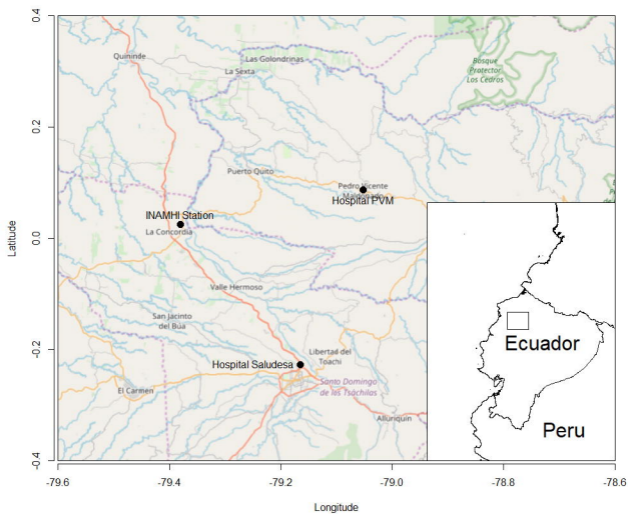

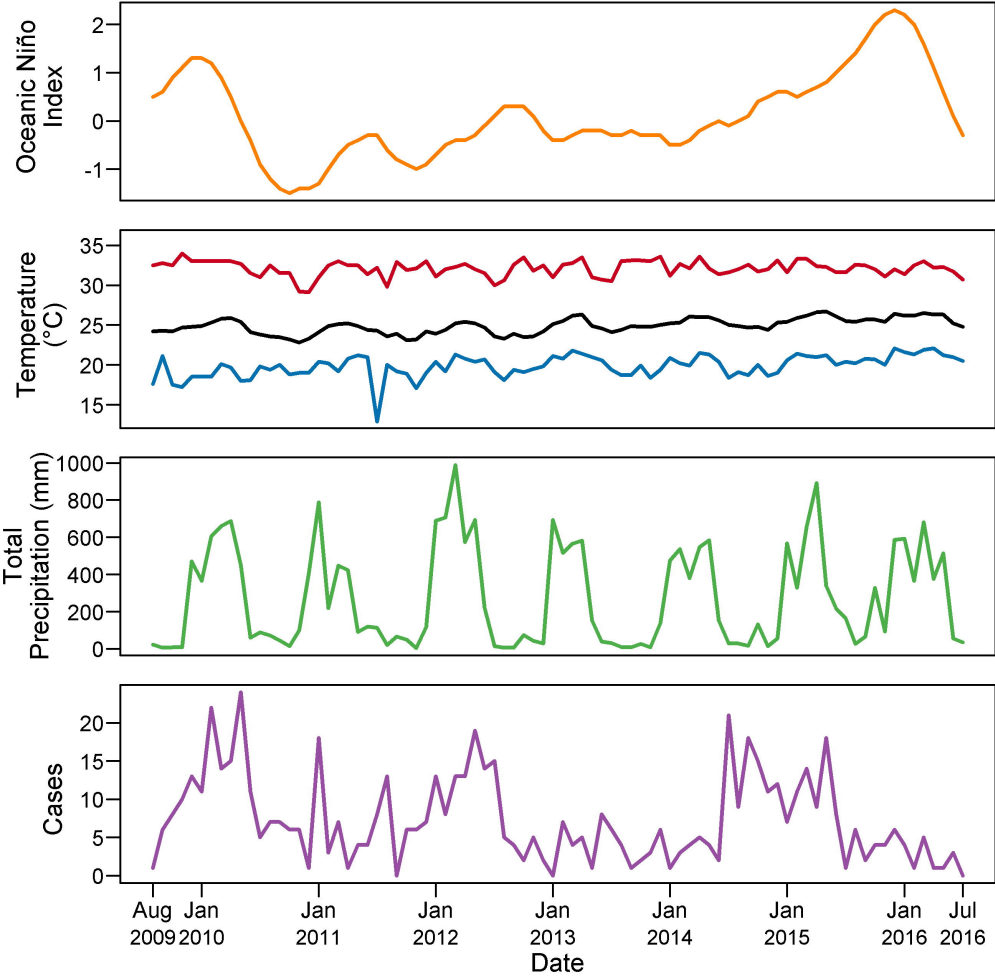

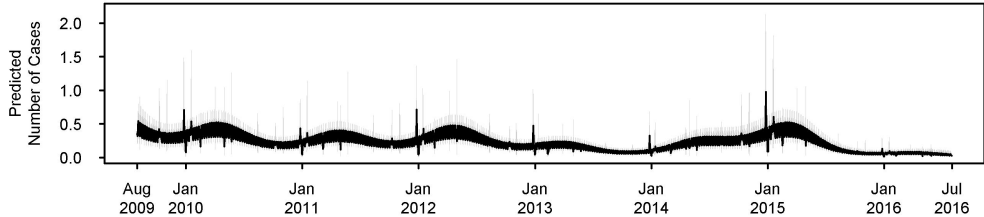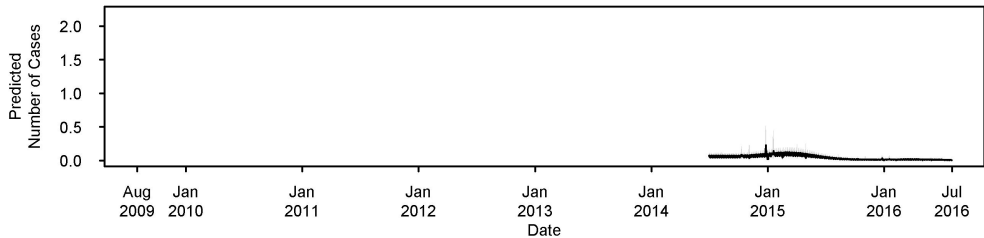

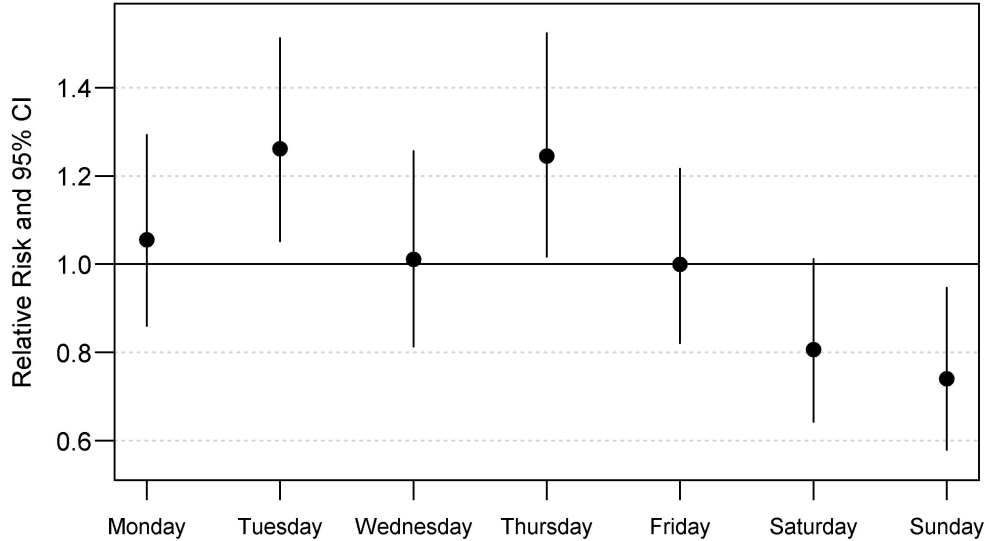



T=18°C

T=19°C

T=20°C

T=21°C

T=22°C

875 mm

625 mm

375 mm

125 mm

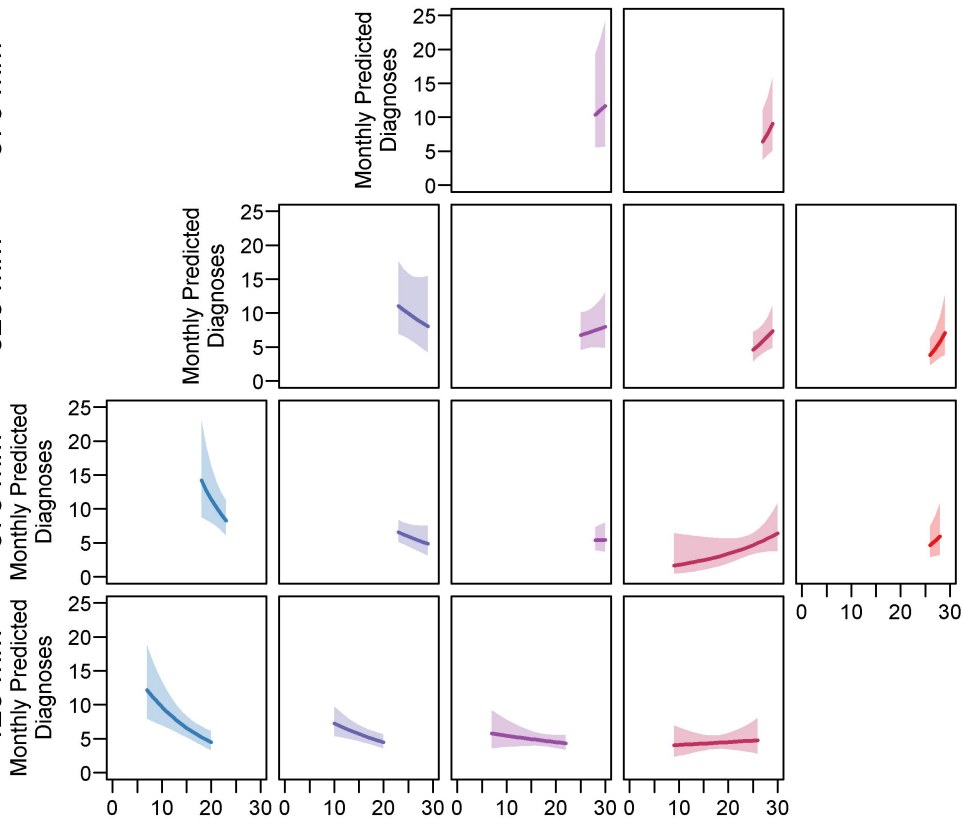

Number of Days with Precipitation

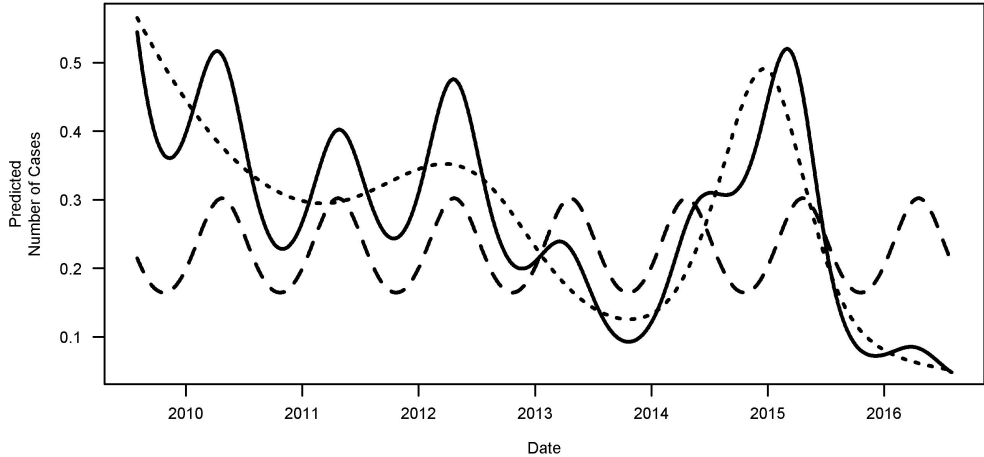

Source: https://www.biorxiv.org/content/10.1101/452318v2.full.pdf
